# Supplementary material
Source: ML conference proceedings conference paper supplement (https://proceedings.mlr.press/v97/nock19a.html)
Supplement: Supplementary file 1 [file nock19a-supp.pdf]

# Lossless or Quantized Boosting with Integer Arithmetic — Supplementary Material —

Richard Nock

Data61, The Australian National University & The University of Sydney  
`richard.nock@data61.csiro.au`

Robert C. Williamson

The Australian National University & Data61  
`bob.williamson@anu.edu.au`

## **Abstract**

This is the Supplementary Material to Paper "Lossless or Quantized Boosting with Integer Arithmetic", appearing in the proceedings of ICML 2019. Notation "main file" indicates reference to the paper.

# 1 Table of contents

|                                              |       |
|----------------------------------------------|-------|
| <b>Supplementary material on proofs</b>      | Pg 3  |
| Proof of Theorem 5                           | Pg 3  |
| ↔ Comments on properness vs the Q-loss       | Pg 3  |
| ↔ Detailed proof                             | Pg 4  |
| Proof of Lemma 6                             | Pg 6  |
| Proof of Theorem 7                           | Pg 7  |
| Proof of Theorem 8                           | Pg 9  |
| Proof of Theorem 10                          | Pg 10 |
| <br>                                         |       |
| <b>Supplementary material on experiments</b> | Pg 16 |
| Implementation                               | Pg 16 |
| Domain summary Table                         | Pg 16 |
| UCI fertility                                | Pg 18 |
| UCI haberman                                 | Pg 19 |
| UCI transfusion                              | Pg 20 |
| UCI banknote                                 | Pg 21 |
| UCI breastwisc                               | Pg 22 |
| UCI ionosphere                               | Pg 23 |
| UCI sonar                                    | Pg 24 |
| UCI yeast                                    | Pg 25 |
| UCI winered                                  | Pg 26 |
| UCI cardiocography                           | Pg 27 |
| UCI creditcardsmall                          | Pg 28 |
| UCI abalone                                  | Pg 29 |
| UCI qsar                                     | Pg 30 |
| UCI winewhite                                | Pg 31 |
| UCI page                                     | Pg 32 |
| UCI mice                                     | Pg 33 |
| UCI hill+noise                               | Pg 34 |
| UCI hill+nonoise                             | Pg 35 |
| UCI firmteacher                              | Pg 36 |
| UCI magic                                    | Pg 37 |
| UCI eeg                                      | Pg 38 |
| UCI skin                                     | Pg 39 |
| UCI musk                                     | Pg 40 |
| UCI hardware                                 | Pg 41 |
| UCI twitter                                  | Pg 42 |
| Summary of Results                           | Pg 43 |

## 2 Proof of Theorem 5

### 2.1 Comments on properness vs the Q-loss

We explain here why we have left open the unit interval for the definition of (2) and why parameter  $\varepsilon$  in the definition of the partial losses of the Q-loss is important for its properness, *even when* the actual value of  $\varepsilon$  has absolutely no influence on RATBOOST nor the decision tree induction algorithm using  $\underline{L}^Q$ . A large class of partial losses is defined in Buja et al. (2005, Theorem 1)<sup>1</sup>, from which the following,

$$\ell_1(u) \doteq \int_u^{1-\varepsilon} (1-c)w(dc), \quad (1)$$

$$\ell_{-1}(u) \doteq \int_\varepsilon^u cw(dc) \quad (2)$$

defines partial losses of a proper loss, where  $w$  is a positive measure require to be finite on any interval  $(\varepsilon, 1 - \varepsilon)$  with<sup>2</sup>  $0 < \varepsilon \leq 1/2$ . The definition of proper losses in Reid & Williamson (2010, Theorem 6) implicitly assumes that the integrals are proper so the limits of (1), (2) exist for  $\varepsilon \rightarrow 0$ .

In our case, it is not hard to reconstruct the partial losses of Definition 4 from (1), (2) provided we pick

$$w(dc) \doteq \frac{\varrho \cdot dc}{\text{err}(c)^2}, \quad (3)$$

which indeed meets the requirements of Buja et al. (2005, Theorem 1) (see (9) below). So, the Q-loss implicitly constrains the domain of the pointwise Bayes risk to be  $(\varepsilon, 1 - \varepsilon)$  for it to fit to (1), (2). While this brings the benefit to prevent infinite values for the pointwise Bayes risk ( $\lim_0 \underline{L}^Q(u) = \lim_1 \underline{L}^Q(u) = -\infty$ ), this also does not represent a restriction for learning:

- this restricts *in theory* the image of  $H_T$  in RATBOOST to  $[\psi(\varepsilon), -\psi(\varepsilon)]$  using the canonical link, that is:

$$\text{Im}H_T \subseteq \varrho \cdot \left(\frac{1}{\varepsilon} - 2\right) \cdot [-1, 1], \quad (4)$$

*but* all components of  $H_T$  have finite values in RATBOOST (including the images of weak hypotheses, wlog), so we can just consider that  $\varepsilon$  is implicitly fixed as small as possible for (4) to hold (again, learning  $H_T$  in RATBOOST does not depend on  $\varepsilon$ );

- this restricts *in theory* the proportion  $p$  of examples of class  $\pm 1$  at each leaf of a decision tree to be in  $(\varepsilon, 1 - \varepsilon)$  for the tree to be learned with  $\underline{L}^Q$ , *but* this happens not to be restrictive, for three reasons. First, all classical top-down induction algorithms use losses whose Bayes risk zeroes in 0, 1, so we can train those trees by discarding pure leaves in the computation of  $\underline{L}$  (Section 7). Second, discarding pure leaves from the computation of the loss does not endanger the weak learning assumption. Third, in practice DTs are pruned for good generalization: classical statistical methods will in general end up with trees with pure leaves removed Kearns & Mansour (1998).

<sup>1</sup>And an even larger class is defined in Schervish (1989, Theorem 4.2).

<sup>2</sup>Buja et al. (2005, Theorem 1) is slightly more general as the integrals bounds depending on  $\varepsilon$  are replaced by variables in  $(\varepsilon, 1 - \varepsilon)$ .

## 2.2 Detailed proof

We use Shuford, Jr et al. (1966, Theorem 1), Reid & Williamson (2010, Theorem 1) to show that the Q-loss is proper. For this to hold, we just need to show that  $-u\ell_1^{Q'}(u) = (1-u)\ell_{-1}^{Q'}(u)$ ,  $\forall u \in (0, 1)$ , where ' denotes derivative. We then check that whenever  $u \leq 1/2$ , we have  $\ell_1^{Q'}(u) = \varrho \cdot (-1/u^2 + 1/u)$  and  $\ell_{-1}^{Q'}(u) = \varrho \cdot (1/u)$ , so that

$$\begin{aligned} -u\ell_1^{Q'}(u) &= \varrho \cdot \left( \frac{1}{u} - 1 \right) = \varrho \cdot \left( \frac{1-u}{u} \right); \\ (1-u)\ell_{-1}^{Q'}(u) &= \varrho \cdot \left( \frac{1-u}{u} \right), \end{aligned} \tag{5}$$

so the Q-loss is proper. To show that it is strictly proper is just a matter of completing three steps: (i) computing the pointwise Bayes risk  $\underline{L}^Q$ , (ii) computing its weight function  $w^Q(u)$  and showing that it is strictly positive for any  $u \in [0, 1]$  Reid & Williamson (2010, Theorem 6). To achieve step (i), we remark that because  $\ell^Q$  is proper Reid & Williamson (2010),

$$\begin{aligned} &\frac{1}{\varrho} \cdot \underline{L}^Q(u) \\ &= L^Q(u, u) \\ &= u \cdot \ell_1^Q(u) + (1-u) \cdot \ell_{-1}^Q(u) \\ &= \begin{cases} -u \log \varepsilon - 2u + 1 + u \log u - (1-u) \log \varepsilon + (1-u) \log u & \text{if } u \leq 1/2 \\ -u \log \varepsilon + u \log(1-u) - (1-u) \log \varepsilon - 2(1-u) + 1 + (1-u) \log(1-u) & \text{otherwise} \end{cases} \tag{6} \\ &= -\log \varepsilon + \begin{cases} -2u + 1 + \log u & \text{if } u \leq 1/2 \\ -2(1-u) + 1 + \log(1-u) & \text{otherwise} \end{cases} \tag{7} \\ &= -\log \varepsilon + \log \text{err}(u) + 1 - 2\text{err}(u) \\ &= \log \left( \frac{\text{err}(u)}{\varepsilon} \right) + 1 - 2\text{err}(u), \end{aligned} \tag{8}$$

and we retrieve (11). We then easily check that its weight function equals Buja et al. (2005)

$$\begin{aligned} w^Q(u) &\doteq -\underline{L}^{Q''}(u) \\ &= -\varrho \cdot \left( \begin{cases} \frac{1}{u} - 2 & \text{if } u \leq 1/2 \\ -\frac{1}{1-u} + 2 & \text{otherwise} \end{cases} \right)' \\ &= \varrho \cdot \begin{cases} \frac{1}{u^2} & \text{if } u \leq 1/2 \\ \frac{1}{(1-u)^2} & \text{otherwise} \end{cases} \\ &= \frac{\varrho}{\text{err}(u)^2}, \end{aligned} \tag{9}$$

which is indeed  $> 0$  for any  $u \in [0, 1]$ , and shows that the Q-loss is strictly proper. We also remark that  $\underline{L}^Q$  is twice differentiable. The computation of the inverse link is then, from (5) (we recall that

$K = 0$ ),

$$\begin{aligned}\psi^{Q^{-1}}(z) &\doteq \left(-\underline{L}^{Q'}\right)^{-1}(z) \\ &= \left(\varrho \cdot \begin{cases} 2 - \frac{1}{u} & \text{if } u \leq 1/2 \\ -2 + \frac{1}{1-u} & \text{otherwise} \end{cases}\right)^{-1}\end{aligned}\quad (10)$$

$$\begin{aligned}&= \begin{cases} \frac{1}{2-\frac{z}{\varrho}} & \text{if } z \leq 0 \\ \frac{1+\frac{z}{\varrho}}{2+\frac{z}{\varrho}} & \text{otherwise} \end{cases} \\ &= \frac{\varrho + \mathbf{H}(-z)}{2\varrho + |z|},\end{aligned}\quad (11)$$

as claimed (link immediate from (10)). The convex surrogate for the Q-loss is obtained from (7), and we first search for  $(-\underline{L})^*$ :

$$\begin{aligned}(-\underline{L}^Q)^*(z) &\doteq \sup_{z' \in \text{dom}(\underline{L}^Q)} \{zz' + \underline{L}^Q(z')\} \\ &= \sup_{u \in [0,1]} \left\{ zu + \varrho \cdot \left( \log \left( \frac{\text{err}(u)}{\varepsilon} \right) + 1 - 2\text{err}(u) \right) \right\} \\ &= \varrho \cdot (1 - \log \varepsilon) + \max \left\{ \sup_{u \in [0,1/2]} \{(z - 2\varrho)u + \varrho \cdot \log u\}, -2\varrho + \sup_{u \in (1/2,1]} \{(z + 2\varrho)u + \varrho \cdot \log(1 - u)\} \right\} \\ &= \varrho \cdot (1 - \log \varepsilon) + \max \begin{cases} \varrho \log \varrho + \varrho \cdot \frac{z-2\varrho}{2\varrho-z} - \varrho \cdot \log(2\varrho - z) & \text{for } u = \varrho \cdot \frac{1}{2\varrho-z} \in [0, 1/2] \\ \varrho \log \varrho - 2\varrho + \frac{(z+\varrho)(z+2\varrho)}{z+2\varrho} - \varrho \cdot \log(2\varrho + z) & \text{for } u = \frac{z+\varrho}{z+2\varrho} \in (1/2, 1] \end{cases} \\ &= \varrho \log \varrho - \varrho \cdot \log \varepsilon + \max \begin{cases} -\varrho \cdot \log(2\varrho - z) & \text{for } u = \varrho \cdot \frac{1}{2\varrho-z} \in [0, 1/2] \\ z - \varrho \cdot \log(2\varrho + z) & \text{for } u = \frac{z+\varrho}{z+2\varrho} \in (1/2, 1] \end{cases} \\ &= -\varrho \log \left( \frac{\varepsilon}{\varrho} \right) + \max \begin{cases} -\varrho \cdot \log(2\varrho - z) & \text{for } z \leq 0 \\ z - \varrho \cdot \log(2\varrho + z) & \text{for } z > 0 \end{cases} \\ &= -\varrho \log \left( \frac{\varepsilon}{\varrho} \right) + \begin{cases} -\varrho \cdot \log(2\varrho - z) & \text{for } z \leq 0 \\ z - \varrho \cdot \log(2\varrho + z) & \text{for } z > 0 \end{cases} \\ &= -\varrho \cdot \log \left( 2\varepsilon + \frac{\varepsilon|z|}{\varrho} \right) + \mathbf{H}(-z),\end{aligned}\quad (12)$$

and we get

$$F^Q(z) \doteq (-\underline{L}^Q)^*(-z) \quad (13)$$

$$= -\varrho \cdot \log \left( 2\varepsilon + \frac{\varepsilon|z|}{\varrho} \right) + \mathbf{H}(z), \quad (14)$$

as claimed. This derivation also allows us to prove that the Q-loss is proper canonical using Nock & Nielsen (2008, Lemma 1). That the Q-loss is symmetric is just a consequence of its definition Reid & Williamson (2010). This ends the proof of Theorem 5.

### 3 Proof of Lemma 6

Denote for short

$$v \doteq z + \varrho \cdot \left( \frac{1 - 2u}{\text{err}(u)} \right). \quad (15)$$

It is not hard to check that indeed

$$z \diamond u = \frac{\varrho + H(v)}{2\varrho + |v|} \doteq g(v), \quad (16)$$

as well as  $g(-v) = 1 - g(v)$ . So, we focus on the second equality. Denote for short  $u \doteq n_u/d_u$ ,  $z \doteq \varrho \cdot n_z/d_z$ . We remark that the definition of  $z$  makes  $\varrho$  simplify:

$$\begin{aligned} z \diamond u &= \frac{1 + H\left(\frac{n_z}{d_z} + \frac{1 - 2 \cdot \frac{n_u}{d_u}}{\frac{n_u}{d_u} \wedge \frac{d_u - n_u}{d_u}}\right)}{2 + \left| \frac{n_z}{d_z} + \frac{1 - 2 \cdot \frac{n_u}{d_u}}{\frac{n_u}{d_u} \wedge \frac{d_u - n_u}{d_u}} \right|} \\ &= \frac{1 + H\left(\frac{n_z}{d_z} + \frac{d_u - 2n_u}{n_u \wedge (d_u - n_u)}\right)}{2 + \left| \frac{n_z}{d_z} + \frac{d_u - 2n_u}{n_u \wedge (d_u - n_u)} \right|} \end{aligned} \quad (17)$$

**Case 1:**  $v \geq 0$  and  $n_u \leq d_u - n_u$ . We have

$$\begin{aligned} z \diamond u &= \frac{1}{2 + \frac{n_z}{d_z} + \frac{d_u - 2n_u}{n_u}} \\ &= \frac{1}{\frac{n_z}{d_z} + \frac{d_u}{n_u}} = \frac{n_u d_z}{n_u n_z + d_u d_z}. \end{aligned} \quad (18)$$

**Case 2:**  $v \geq 0$  and  $n_u > d_u - n_u$ . We have

$$\begin{aligned} z \diamond u &= \frac{1}{2 + \frac{n_z}{d_z} + \frac{d_u - 2n_u}{d_u - n_u}} \\ &= \frac{1}{3 + \frac{n_z}{d_z} - \frac{n_u}{d_u - n_u}} \\ &= \frac{(d_u - n_u)d_z}{(d_u - n_u)(3d_z + n_z) - n_u d_z} \\ &= \frac{(d_u - n_u)d_z}{(d_u - n_u)n_z + d_u d_z + 2(d_u - 2n_u)d_z}. \end{aligned} \quad (19)$$

Folding both cases 1 and 2, we get

$$z \diamond u = \frac{(n_u \wedge (d_u - n_u))d_z}{(n_u \wedge (d_u - n_u))n_z + d_u d_z - 2\mathbf{H}(d_u - 2n_u)d_z}. \quad (20)$$

Note that this holds when  $v \geq 0$ , equivalent to

$$\frac{n_z}{d_z} + \frac{d_u - 2n_u}{n_u \wedge (d_u - n_u)} > 0, \quad (21)$$

that is, assuming wlog  $d_z > 0$ ,

$$(n_u \wedge (d_u - n_u))n_z > -(d_u - 2n_u)d_z. \quad (22)$$

So, let us denote  $a \doteq (n_u \wedge (d_u - n_u))d_z$ ,  $b \doteq (n_u \wedge (d_u - n_u))n_z$ ,  $c \doteq d_u d_z$ ,  $d \doteq 2(d_u - 2n_u)d_z$ . We get that if  $b + (d/2) \geq 0$ , then

$$z \diamond u = \frac{a}{b + c - \mathsf{H}(d)}, \quad (23)$$

and if  $b + (d/2) < 0$ , then we remark that  $-b - (d/2) > 0$ , so

$$z \diamond u = 1 - \frac{a}{-b + c - \mathsf{H}(-d)} = \frac{-b - a + c - \mathsf{H}(-d)}{-b + c - \mathsf{H}(-d)}, \quad (24)$$

as claimed.

## 4 Proof of Theorem 7

The proof revolves on two simple facts about  $F^Q$ : (i) since  $F^Q$  is convex and differentiable, we have  $F^Q(y) - F^Q(x) - (y - x)F^{Q'}(x) \geq 0$  (the left hand side is just the Bregman divergence with generator  $F^Q$ ). Also, (ii)  $F^Q$  being twice differentiable, Taylor Theorem says that for any  $x, y$  we can expand the derivative as  $F^{Q'}(y) = F^{Q'}(x) + (y - x)F^{Q''}(z)$  for some  $z \in [x, y]$ . Using (i) and (ii) in this order, we get that fo for any  $i \in \{1, 2, \dots, m\}$ , there exists  $\alpha_i \in [0, 1]$  and

$$\beta_i = y_i H_t(\mathbf{x}_i) + \alpha_i \delta_t y_i h_t(\mathbf{x}_i) \in [y_i H_t(\mathbf{x}_i), y_i H_{t+1}(\mathbf{x}_i)] \quad (25)$$

such that:

$$\begin{aligned} & \mathbb{E}_{i \sim D} [F^Q(y_i H_t(\mathbf{x}_i))] - \mathbb{E}_{i \sim D} [F^Q(y_i H_{t+1}(\mathbf{x}_i))] \\ & \geq \mathbb{E}_{i \sim D} \left[ (y_i H_t(\mathbf{x}_i) - y_i H_{t+1}(\mathbf{x}_i)) F^{Q'}(y_i H_{t+1}(\mathbf{x}_i)) \right] \quad (26) \\ & = \underbrace{\mathbb{E}_{i \sim D} \left[ (y_i H_t(\mathbf{x}_i) - y_i H_{t+1}(\mathbf{x}_i)) F^{Q'}(y_i H_t(\mathbf{x}_i)) \right]}_{\doteq X} - \underbrace{\mathbb{E}_{i \sim D} \left[ (y_i H_t(\mathbf{x}_i) - y_i H_{t+1}(\mathbf{x}_i))^2 F^{Q''}(\beta_i) \right]}_{\doteq Y} \end{aligned}$$

Because  $F^Q$  is convex,  $Y \geq 0$ . We want to show that not just  $X \geq 0$  but in fact the difference  $X - Y$  is sufficiently large for the bound of the Theorem to hold. We first remark

$$\begin{aligned} X & \doteq \mathbb{E}_{i \sim D} \left[ (y_i H_t(\mathbf{x}_i) - y_i H_{t+1}(\mathbf{x}_i)) F^{Q'}(y_i H_t(\mathbf{x}_i)) \right] \\ & = -\delta_t \mathbb{E}_{i \sim D} \left[ y_i h_t(\mathbf{x}_i) \cdot -\psi^{Q^{-1}}(-y_i H_t(\mathbf{x}_i)) \right] \\ & = \delta_t \mathbb{E}_{i \sim D} [w_{ti} y_i h_t(\mathbf{x}_i)] \\ & = \delta_t \cdot \frac{\sum_i w_{ti} y_i h_t(\mathbf{x}_i)}{m} \\ & = a \cdot \eta_t^2. \quad (28) \end{aligned}$$

We also have  $F^{Q''}(z) = \varrho/(2\varrho + |z|)^2$ , so

$$\begin{aligned}
Y &\doteq \mathbb{E}_{i \sim D} \left[ (y_i H_t(\mathbf{x}_i) - y_i H_{t+1}(\mathbf{x}_i))^2 F^{Q''}(\beta_i) \right] \\
&= \varrho \cdot \mathbb{E}_{i \sim D} \left[ \frac{(y_i H_t(\mathbf{x}_i) - y_i H_{t+1}(\mathbf{x}_i))^2}{(2 + |\beta_i|)^2} \right] \\
&= \varrho \delta_t^2 \cdot \mathbb{E}_{i \sim D} \left[ \frac{h_t^2(\mathbf{x}_i)}{(2\varrho + |\beta_i|)^2} \right].
\end{aligned} \tag{29}$$

Now we get because of assumption (M):

$$\begin{aligned}
\mathbb{E}_{i \sim D} \left[ \frac{h_t^2(\mathbf{x}_i)}{(2\varrho + |\beta_i|)^2} \right] &\leq \frac{1}{4\varrho^2} \cdot \mathbb{E}_{i \sim D} [h_t^2(\mathbf{x}_i)] \\
&\leq \frac{M^2}{4\varrho^2}.
\end{aligned} \tag{30}$$

So,

$$\begin{aligned}
Y &\leq \frac{\delta_t^2 M^2}{4\varrho} \\
&= \frac{a^2 \cdot \eta_t^2 M^2}{4\varrho}.
\end{aligned} \tag{31}$$

We finally get

$$\begin{aligned}
\mathbb{E}_{i \sim D} [F^Q(y_i H_t(\mathbf{x}_i))] - \mathbb{E}_{i \sim D} [F^Q(y_i H_{t+1}(\mathbf{x}_i))] &\geq X - Y \\
&\geq \underbrace{\left(1 - \frac{aM^2}{4\varrho}\right)}_{\doteq Z(a)} \cdot a \cdot \eta_t^2.
\end{aligned} \tag{32}$$

Suppose now that we fix any  $\pi \in [0, 1]$  and then choose *any*

$$a \in \frac{2\varrho}{M^2} \cdot [1 - \pi, 1 + \pi]. \tag{33}$$

It is not hard to check that  $Z(a)$  satisfies

$$Z(a) \geq (1 - \pi^2) \cdot \frac{\varrho}{M^2} \cdot \eta_t^2, \tag{34}$$

so we get

$$\mathbb{E}_{i \sim D} [F^Q(y_i H_t(\mathbf{x}_i))] - \mathbb{E}_{i \sim D} [F^Q(y_i H_{t+1}(\mathbf{x}_i))] \geq \frac{(1 - \pi^2)\varrho\eta_t^2}{M^2}, \forall t, \tag{35}$$

and so the final classifier  $H_T$  satisfies

$$\mathbb{E}_{i \sim D} [F^Q(y_i H_T(\mathbf{x}_i))] \leq F^Q(0) - \frac{(1 - \pi^2)\varrho \cdot \sum_{t=1}^T \eta_t^2}{M^2}. \tag{36}$$

Remark that this holds regardless of the sequence  $\{\eta_t\}_t$ . If we want to guarantee that  $\mathbb{E}_{i \sim D} [F^Q(y_i H_T(\mathbf{x}_i))] \leq F^Q(z^*)$  for some  $z^* \geq 0$ , then it suffices to iterate until

$$\sum_{t=1}^T \eta_t^2 \geq \frac{F^Q(0) - F^Q(z^*)}{(1 - \pi^2)\varrho} \cdot M^2, \tag{37}$$

and we get the statement of the Theorem.



## 5 Proof of Theorem 8

The proof uses the same basic steps as the proof of Theorem 7. Denote for short

$$\tilde{w}_{ti} \doteq w_{ti} + \kappa_{ti}, \quad (38)$$

where  $w_{ti} \doteq -\psi^{Q-1}(-y_i H_t(\mathbf{x}_i))$  is the non-quantized weights and  $\kappa_{ti}$  is the quantization shift in weights. Note that we do *not* have access to  $w_{ti}$ . We indicate with a tilda quantities that depend on  $\tilde{w}$ .

This time, we have for  $X$  the expression:

$$\begin{aligned} X &= -\tilde{\delta}_t \mathbb{E}_{i \sim D} \left[ y_i h_t(\mathbf{x}_i) \cdot -\psi^{Q-1}(-y_i H_t(\mathbf{x}_i)) \right] \\ &= \tilde{\delta}_t \mathbb{E}_{i \sim D} [w_{ti} y_i h_t(\mathbf{x}_i)] \\ &= \tilde{\delta}_t \cdot \left( \frac{\sum_i \tilde{w}_{ti} y_i h_t(\mathbf{x}_i)}{m} - \frac{\sum_i \kappa_{ti} y_i h_t(\mathbf{x}_i)}{m} \right) \\ &= a \cdot \tilde{\eta}_t^2 - a \cdot \tilde{\eta}_t \cdot \frac{\sum_i \kappa_{ti} y_i h_t(\mathbf{x}_i)}{m}, \end{aligned} \quad (39)$$

while the expression of  $Y$  does not change (yet including "tilda" parameters affected by the quantization of weights). Denote for short

$$\Delta_t \doteq \frac{\sum_i \kappa_{ti} y_i h_t(\mathbf{x}_i)}{m}. \quad (40)$$

We get in lieu of (32),

$$\begin{aligned} \mathbb{E}_{i \sim D} [F^Q(y_i H_t(\mathbf{x}_i))] - \mathbb{E}_{i \sim D} [F^Q(y_i H_{t+1}(\mathbf{x}_i))] &\geq X - Y \\ &\geq \left( 1 - \frac{\Delta_t}{\tilde{\eta}_t} - \frac{aM^2}{4\varrho} \right) \cdot a\tilde{\eta}_t^2 \\ &= \underbrace{\left( \frac{4\varrho}{M^2} \cdot \frac{\tilde{\eta}_t - \Delta_t}{\tilde{\eta}_t} - a \right)}_{\doteq Z(a)} \cdot a \cdot \frac{M^2 \tilde{\eta}_t^2}{4\varrho} \end{aligned} \quad (41)$$

Choose

$$a \in \frac{2\varrho}{M^2} \cdot \left[ \frac{\tilde{\eta}_t - \Delta_t}{\tilde{\eta}_t} - \pi, \frac{\tilde{\eta}_t - \Delta_t}{\tilde{\eta}_t} + \pi \right], \quad (42)$$

for any  $0 \leq \pi \leq |\tilde{\eta}_t - \Delta_t|/\tilde{\eta}_t$ . It follows

$$Z(a) \geq \left( \left( \frac{\tilde{\eta}_t - \Delta_t}{\tilde{\eta}_t} \right)^2 - \pi^2 \right) \cdot \frac{\varrho}{M^2} \cdot \tilde{\eta}_t^2. \quad (43)$$

Suppose that the quantisation shift satisfies  $|\tilde{\eta}_t - \Delta_t| \geq \zeta \cdot |\tilde{\eta}_t|$  (which holds if  $|\Delta_t| \leq (1 - \zeta) \cdot |\tilde{\eta}_t|$ ) for some  $\zeta > 0$ . We obtain that for any  $0 \leq \pi < \zeta$ ,

$$Z(a) \geq (\zeta^2 - \pi^2) \cdot \frac{\varrho}{M^2} \cdot \tilde{\eta}_t^2 > 0, \quad (44)$$

which leads to the statement of the Theorem after posing  $\kappa_t \doteq |\Delta_t|$ .

**Remark:** assumption (Q) is in fact stronger than what would really be needed to get the Theorem. Under some conditions, we could indeed accept  $|\Delta_t| > (1 - \zeta) \cdot |\tilde{\eta}_t|$ , but in the derivations above, the shift in weights due to quantisation would result in a disguised way to strenghten weak learning. Clearly, such an assumption where quantisation compensates for the weakness of the weak classifiers is unfit in a boosting setting.

## 6 Proof of Theorem 10

We assume basic knowledge of the proofs of Kearns & Mansour (1996). We shall briefly present the proof scheme as well as the notations, that we keep identical to Kearns & Mansour (1996) for readability.

The basic of the proof is to show that each time a leaf is replaced by a split under the weak learning assumption, there is a sufficient decrease of  $\underline{L}(H)$ . Denote  $H^+$  tree  $H$  in which a leaf  $\lambda$  has been replaced by a split indexed with some  $g : \mathbb{R} \rightarrow \{0, 1\}$  satisfying the weak learning assumption. The decrease in  $\underline{L}(\cdot)$ ,  $\Delta \doteq \underline{L}(H) - \underline{L}(H^+)$ , is lowerbounded as a function of  $\gamma$  and then used to lowerbound the number of iterations (each of which is the replacement of a leaf by a binary subtree) to get to a given value of  $\underline{L}(\cdot)$

It turns out that  $\Delta$  can be abstracted by a better quantity to analyze,  $\Delta \doteq \omega(\lambda) \cdot \Delta_{\underline{L}^Q}(q, \tau, \delta)$  with

$$\Delta_{\underline{L}^Q}(q, \tau, \delta) \doteq \underline{L}^Q(q) - (1 - \tau)\underline{L}^Q(q - \tau\delta) - \tau\underline{L}^Q(q + (1 - \tau)\delta) \quad (45)$$

with  $q \doteq q(\lambda)$  and  $\delta = \gamma q(1 - q)/(\tau(1 - \tau))$  with  $\tau$  denoting the *relative* proportion of examples for which  $g = +1$  in leaf  $\lambda$ , following Kearns & Mansour (1996). The following Lemma is the key to the proof of Theorem 10.

**Lemma 1** *Suppose the weak hypothesis assumption is satisfied for the current split, for some constant  $\gamma > 0$ . For any  $q, \tau \in [0, 1]$ , using  $\delta = \gamma q(1 - q)/(\tau(1 - \tau))$  yields:*

$$\Delta_{\underline{L}^Q}(q, \tau, \delta) \geq \frac{\gamma^2}{2}. \quad (46)$$

**Proof** Our proof follows the proof of Kearns & Mansour (1996).

**Lemma 2** *Suppose  $\tau \leq 1/2, q > 1/2$  or  $\tau \geq 1/2, q < 1/2$ . If  $\gamma \leq 1/25$ ,  $\Delta_{\underline{L}^Q}(q, \tau, \delta)$  is minimized by some  $\tau \in [0.4, 0.6]$ .*

**Proof** To prove the Lemma we use the trick of Kearns & Mansour (1996, Lemma 4), which consists of studying function

$$\begin{aligned} U(q, X) &\doteq \underline{L}^Q(q - X) + X\underline{L}^{Q'}(q - X) \\ &= \begin{cases} \log(q - X) + \frac{X}{q - X} + 1 - 2q & \text{if } q - X \leq \frac{1}{2} \\ \log(1 - q + X) - \frac{X}{1 - q + X} - 1 + 2q & \text{if } q - X > \frac{1}{2} \end{cases} \end{aligned} \quad (47)$$

and show

$$U(q, \tau\delta) \leq U(q, -(1-\tau)\delta), \forall \tau \leq 0.4, \quad (48)$$

$$U(q, \tau\delta) \geq U(q, -(1-\tau)\delta), \forall \tau \geq 0.6, \quad (49)$$

Case 1:  $\tau \leq 0.4$  (and therefore  $q < 1/2$ ). We have two subcases to show (48).

Case 1.1:  $q + (1-\tau)\delta < 1/2$ . In this case,  $q - X < 1/2$  for both instantiations of  $X$  in (48). We then have

$$U(q, \tau\delta) = \log\left(1 - \frac{\gamma(1-q)}{1-\tau}\right) + \frac{\frac{\gamma(1-q)}{1-\tau}}{1 - \frac{\gamma(1-q)}{1-\tau}} + 1 - 2q + \log q \quad (50)$$

$$= \log\left(\frac{\tau - 1 + \gamma(1-q)}{\tau - 1}\right) - \frac{\gamma(1-q)}{\tau - 1 + \gamma(1-q)} + 1 - 2q + \log q \quad (51)$$

$$U(q, -(1-\tau)\delta) = \log\left(1 + \frac{\gamma(1-q)}{\tau}\right) - \frac{\frac{\gamma(1-q)}{\tau}}{1 + \frac{\gamma(1-q)}{\tau}} + 1 - 2q + \log q \quad (52)$$

$$= \log\left(\frac{\tau + \gamma(1-q)}{\tau}\right) - \frac{\gamma(1-q)}{\tau + \gamma(1-q)} + 1 - 2q + \log q, \quad (53)$$

so (48) is equivalent to showing

$$\log\left(\frac{\tau - 1 + \gamma(1-q)}{\tau - 1}\right) - \frac{\gamma(1-q)}{\tau - 1 + \gamma(1-q)} \leq \log\left(\frac{\tau + \gamma(1-q)}{\tau}\right) - \frac{\gamma(1-q)}{\tau + \gamma(1-q)} \quad (54)$$

which after reorganising and simplification amounts to showing

$$\log\left(1 - \frac{\gamma(1-q)}{(\tau + \gamma(1-q))(1-\tau)}\right) \leq -\frac{\gamma(1-q)}{(\tau + \gamma(1-q))(1-\tau - \gamma(1-q))}. \quad (55)$$

We remark that for the log to be defined in (51), we must have  $\tau < 1 - \gamma(1-q)$ , which implies that the RHS of (55) is negative. To show (55), we use the fact that  $\log(1-X) \leq -X - X^2/2$  when  $X \geq 0$ , so fixing  $X \doteq \gamma(1-q)/((\tau + \gamma(1-q))(1-\tau))$  we obtain

$$\log\left(1 - \frac{\gamma(1-q)}{(\tau + \gamma(1-q))(1-\tau)}\right) \leq -\frac{\gamma(1-q)}{\tau + \gamma(1-q)} \cdot \left(\frac{1}{1-\tau} + \frac{\gamma(1-q)}{2(\tau + \gamma(1-q))(1-\tau)^2}\right) \quad (56)$$

To show (55), we can then show

$$\frac{1}{1-\tau - \gamma(1-q)} \leq \frac{1}{1-\tau} + \frac{\gamma(1-q)}{2(\tau + \gamma(1-q))(1-\tau)^2}, \quad (57)$$

which, after simplification, is equivalent to

$$\frac{1-\tau - \gamma(1-q)}{2(\tau + \gamma(1-q))(1-\tau)} \geq 1, \quad (58)$$

or equivalently  $3\tau - 2\tau^2 + 3\gamma(1-q) - 2\tau\gamma(1-q) \leq 1$ . Since  $\tau \leq 2/5$ ,  $3\tau - 2\tau^2 \leq 22/25$ . If we pick  $\gamma \leq 1/25$ , then  $3\gamma(1-q) - 2\tau\gamma(1-q) \leq 3\gamma(1-q) \leq 3\gamma = 3/25$ , so that

$3\tau - 2\tau^2 + 3\gamma(1 - q) - 2\tau\gamma(1 - q) \leq 1$ , as claimed (end of Case 1.1).

Case 1.2:  $q + (1 - \tau)\delta > 1/2$ . In this case,

$$U(q, -(1 - \tau)\delta) = \log\left(1 - \frac{\gamma q}{\tau}\right) + \frac{\frac{\gamma q}{\tau}}{1 - \frac{\gamma q}{\tau}} + 1 - 2(1 - q) + \log(1 - q) \quad (59)$$

$$= \log\left(\frac{\tau - \gamma q}{\tau}\right) + \frac{\gamma q}{\tau - \gamma q} + 2q - 1 + \log(1 - q). \quad (60)$$

We also remark that  $1 - 2q + \log q \leq 2q - 1 + \log(1 - q)$  for  $q < 1/2$ , so to prove (48), it is sufficient to show

$$\log\left(\frac{\tau - 1 + \gamma(1 - q)}{\tau - 1}\right) - \frac{\gamma(1 - q)}{\tau - 1 + \gamma(1 - q)} \leq \log\left(\frac{\tau - \gamma q}{\tau}\right) + \frac{\gamma q}{\tau - \gamma q}, \quad (61)$$

which reduces after simplification to showing that

$$\log\left(1 + \frac{\gamma(q - \tau)}{(\tau - \gamma q)(1 - \tau)}\right) \leq \frac{\gamma(q - \tau)}{(\tau - \gamma q)(1 - \tau - \gamma(1 - q))}. \quad (62)$$

Because  $q + (1 - \tau)\delta > 1/2$ , if  $\tau \geq 10\gamma q(1 - q)$ , then  $q > 0.4$  and therefore  $q > \tau$ . If, on the other hand  $\tau \leq 10\gamma q(1 - q)$ , then if  $\gamma \leq 1/10$ , it follows also  $\tau \leq q$ . To summarize,  $q + (1 - \tau)\delta > 1/2$  and  $\gamma \leq 1/10$  imply  $q \geq \tau$ .

Using the fact that  $\log(1 + X) \leq X$  and  $\gamma(1 - q) \geq 0$ , we easily obtain the proof of (62) via the chain of inequalities

$$\log\left(1 + \frac{\gamma(q - \tau)}{(\tau - \gamma q)(1 - \tau)}\right) \leq \frac{\gamma(q - \tau)}{(\tau - \gamma q)(1 - \tau)} \leq \frac{\gamma(q - \tau)}{(\tau - \gamma q)(1 - \tau - \gamma(1 - q))}. \quad (63)$$

This ends up the proof for Case 1.

Case 2:  $\tau \geq 0.6$  (and therefore  $q > 1/2$ ). We have two cases again, this time to show (49).

Case 2.1:  $q - \tau\delta > 1/2$ . In this case,  $q - X > 1/2$  for both instantiations of  $X$  in (49). We then have

$$U(q, \tau\delta) = \log\left(1 + \frac{\gamma q}{1 - \tau}\right) - \frac{\gamma q}{1 - \tau + \gamma q} - 1 + 2q + \log(1 - q) \quad (64)$$

$$U(q, -(1 - \tau)\delta) = \log\left(1 - \frac{\gamma q}{\tau}\right) + \frac{\gamma q}{\tau - \gamma q} - 1 + 2q + \log(1 - q), \quad (65)$$

To show (49), it is thus sufficient to show that

$$\log\left(1 + \frac{\gamma q}{1 - \tau}\right) - \frac{\gamma q}{1 - \tau + \gamma q} \geq \log\left(1 - \frac{\gamma q}{\tau}\right) + \frac{\gamma q}{\tau - \gamma q}, \quad (66)$$

or equivalently, after reordering and simplifying,

$$\log\left(1 - \frac{\gamma q}{\tau(1 - \tau + \gamma q)}\right) \leq -\frac{\gamma q}{(\tau - \gamma q)(1 - \tau + \gamma q)}, \quad (67)$$

which is (55) with the substitution  $\tau \mapsto 1 - \tau$  and  $q \mapsto 1 - q$ . Since then  $1 - \tau \leq 0.4$ , we can directly apply the proof of (55), which ends the proof of Case 2.1.

Case 2.2:  $q - \tau\delta < 1/2$ . In this case,

$$U(q, \tau\delta) = \log\left(1 - \frac{\gamma(1-q)}{1-\tau}\right) + \frac{\gamma(1-q)}{1-\tau-\gamma(1-q)} + 1 - 2q + \log q, \quad (68)$$

while we still have

$$U(q, -(1-\tau)\delta) = \log\left(1 - \frac{\gamma q}{\tau}\right) + \frac{\gamma q}{\tau-\gamma q} - 1 + 2q + \log(1-q), \quad (69)$$

and so we want to show

$$\begin{aligned} & \log\left(1 - \frac{\gamma q}{\tau}\right) + \frac{\gamma q}{\tau-\gamma q} - 1 + 2q + \log(1-q) \\ & \leq \log\left(1 - \frac{\gamma(1-q)}{1-\tau}\right) + \frac{\gamma(1-q)}{1-\tau-\gamma(1-q)} + 1 - 2q + \log q, \end{aligned} \quad (70)$$

We also remark that  $-1 + 2q + \log(1-q) \leq 1 - 2q + \log q$  for  $q > 1/2$ , so to prove (70), it is sufficient to show

$$\log\left(1 - \frac{\gamma q}{\tau}\right) + \frac{\gamma q}{\tau-\gamma q} \leq \log\left(1 - \frac{\gamma(1-q)}{1-\tau}\right) + \frac{\gamma(1-q)}{1-\tau-\gamma(1-q)}, \quad (71)$$

which reduces after simplification to showing that

$$\log\left(1 + \frac{\gamma(\tau-q)}{(1-\tau-\gamma(1-q))\tau}\right) \leq \frac{\gamma(\tau-q)}{(\tau-\gamma q)(1-\tau-\gamma(1-q))}, \quad (72)$$

which turns out to be (62) with the substitution  $\tau \mapsto 1 - \tau$  and  $q \mapsto 1 - q$ . Since then  $1 - \tau \leq 0.4$ , we can directly apply the proof of (62), which ends the proof of Case 2.2, and the proof of Lemma 2 as well. (end of the proof of Lemma 2)  $\blacksquare$

Following Kearns & Mansour (1996), we define

$$F_{\underline{L}^Q}(q, \tau, \delta) \doteq -\frac{\tau(1-\tau)\delta^2}{2}\underline{L}^{Q''}(q) - \frac{\tau(1-\tau)(1-2\tau)\delta^3}{6}\underline{L}^{Q^{(3)}}(q). \quad (73)$$

We now state and prove the equivalent of (Kearns & Mansour, 1996, Lemma 3).

**Lemma 3** For any  $q, \tau, \delta \in [0, 1]$ ,

$$\Delta_{\underline{L}^Q}(q, \tau, \delta) \geq F_{\underline{L}^Q}(q, \tau, \delta). \quad (74)$$

**Proof** We have

$$\underline{L}^{Q^{(k)}}(q) = \varrho \cdot \begin{cases} \frac{(-1)^{k-1}(k-1)!}{q^k} - 2 \cdot \llbracket k = 1 \rrbracket & \text{if } q < 1/2 \\ -\frac{(k-1)!}{(1-q)^k} + 2 \cdot \llbracket k = 1 \rrbracket & \text{if } q > 1/2 \end{cases}, \quad (75)$$

and we check that only the first and second order derivatives are defined in  $q = 1/2$ . Since  $\underline{L}^Q$  is symmetric around  $1/2$ ,  $\Delta_{\underline{L}^Q}$  satisfies

$$\begin{aligned}\Delta_{\underline{L}^Q}\left(\frac{1}{2}-q, 1-\tau, \delta\right) &= \underline{L}^Q\left(\frac{1}{2}-q\right)-\tau \underline{L}^Q\left(\frac{1}{2}-q-(1-\tau) \delta\right)-(1-\tau) \underline{L}^Q\left(\frac{1}{2}-q+\tau \delta\right) \\ &= \underline{L}^Q(q)-\tau \underline{L}^Q\left(\frac{1}{2}-\left(q+(1-\tau) \delta\right)\right)-(1-\tau) \underline{L}^Q\left(\frac{1}{2}-\left(q-\tau \delta\right)\right) \\ &= \underline{L}^Q(q)-\tau \underline{L}^Q\left(q+(1-\tau) \delta\right)-(1-\tau) \underline{L}^Q\left(q-\tau \delta\right)=\Delta_{\underline{L}^Q}(q, \tau, \delta),\end{aligned}\quad (76)$$

so we study  $\Delta_{\underline{L}^Q}$  for  $q > 1/2$  without loss of generality. In this case, all derivatives  $\underline{L}^Q$  at order  $k \geq 4$  are all negative, which from (Kearns & Mansour, 1996, Lemma 3) guarantees that

$$\Delta_{\underline{L}^Q}(q, \tau, \delta) \geq F_{\underline{L}^Q}(q, \tau, \delta), \quad (77)$$

as claimed. (end of the proof of Lemma 3)  $\blacksquare$

We now lowerbound  $F_{\underline{L}^Q}(q, \tau, \delta)$ , which, from Lemma 3, will also provide a lowerbound for the decrease in  $\Delta_{\underline{L}^Q}(q, \tau, \delta)$  and in fact will show Lemma 1. From now on, let us fix  $\delta = \gamma q(1 - q)/(\tau(1 - \tau))$ , if we denote  $V(\tau, q) \doteq (1 - 2\tau)(q - \llbracket q < 1/2 \rrbracket)$ , then

$$F_{\underline{L}^Q}(q, \tau, \delta) = \max\{q, 1 - q\}^2 \gamma^2 \cdot \left( \frac{1}{2\tau(1 - \tau)} + \frac{\gamma}{3\tau^2(1 - \tau)^2} \cdot V(\tau, q) \right). \quad (78)$$

We immediately obtain

**Lemma 4** *Let  $\delta = \gamma q(1 - q)/(\tau(1 - \tau))$ . Then for any  $\tau, q$  such that  $V(\tau, q) \geq 0$ ,*

$$F_{\underline{L}^Q}(q, \tau, \delta) \geq \frac{\gamma^2}{2}. \quad (79)$$

**Proof** For any  $\tau, q$  such that  $V(\tau, q) \geq 0$ , we have

$$F_{\underline{L}^Q}(q, \tau, \delta) \geq \max\{q, 1 - q\}^2 \gamma^2 \cdot \frac{1}{2\tau(1 - \tau)} \geq \frac{1}{4} \cdot \gamma^2 \cdot 2 = \frac{\gamma^2}{2}, \quad (80)$$

as claimed (end of the proof of Lemma 4).  $\blacksquare$

Lemma 4 means that when  $\tau \leq 1/2, q < 1/2$  or  $\tau \geq 1/2, q > 1/2$ , the drop  $\Delta_{\underline{L}^Q}(q, \tau, \delta)$  is guaranteed to be "big". If this does not happen, we make use of Lemma 2. In this case, if we pick wlog  $\tau \leq 1/2, q > 1/2$  and get:

$$\begin{aligned}F_{\underline{L}^Q}(q, \tau, \delta) &= \max\{q, 1 - q\}^2 \gamma^2 \cdot \left( \frac{1}{2\tau(1 - \tau)} - \frac{\gamma(1 - 2\tau)(1 - q)}{3\tau^2(1 - \tau)^2} \right) \\ &\geq \frac{\gamma^2}{2} \cdot \left( 2 - \frac{\gamma(1 - 2 \cdot 0.4)}{3 \cdot 0.4^2(1 - 0.4)^2} \right) = \gamma^2 \cdot \left( 1 - \frac{625\gamma}{216} \right) \geq \gamma^2 \cdot \left( 1 - \frac{25}{216} \right) \geq \frac{\gamma^2}{2},\end{aligned}$$

which therefore implies that  $F_{\underline{L}^Q}(q, \tau, \delta) \geq \gamma^2/2$  in all cases. We just have to use Lemma 3 to finish the proof of Lemma 1 (end of the proof of Lemma 1).  $\blacksquare$

We can now finish the proof of Theorem 10. Suppose the current tree  $H$  has  $t$  leaves. There must be a leaf with  $\omega(\lambda) \geq 1/t$ , so

$$\begin{aligned} \Delta &\doteq \underline{L}^Q(H) - \underline{L}^Q(H^+) \\ &= \omega(\lambda) \Delta_{\underline{L}^Q}(q, \tau, \delta) \geq \frac{\gamma^2}{2t} \\ &\geq \frac{\gamma^2}{2t} \cdot \frac{\underline{L}^Q(H)}{\underline{L}^Q(H_0)}, \end{aligned} \tag{81}$$

where the last inequality follows from the concavity of  $\underline{L}^Q$ , letting  $H_0$  the single-root node tree for which  $\underline{L}^Q(H_0) = \underline{L}^Q(q(\mathcal{S}))$ , and more generally  $H_t$  a tree with  $t + 1$  leaves (thus we have made  $t$  iterations of the boosting procedure). It therefore comes the recurrence relationship

$$\underline{L}^Q(H_{t+1}) \leq \left(1 - \frac{\gamma^2}{2\underline{L}^Q(q(\mathcal{S})) \cdot t}\right) \cdot \underline{L}^Q(H_t), \tag{82}$$

and we get (see (Kearns & Mansour, 1996, proof of Theorem 10))

$$\underline{L}^Q(H_t) \leq \exp\left(-\frac{\gamma^2 \log t}{4\underline{L}^Q(q(\mathcal{S}))}\right) \cdot \underline{L}^Q(q(\mathcal{S})), \tag{83}$$

to obtain  $\underline{L}^Q(H_t) \leq \rho \cdot \underline{L}^Q(q(\mathcal{S}))$  for  $\rho \in (0, 1]$ , it therefore suffices that

$$t \geq \left(\frac{1}{\rho}\right)^{\frac{4 \cdot \underline{L}^Q(q(\mathcal{S}))}{\gamma^2}}. \tag{84}$$

We finally remark that  $\underline{L}^Q(q(\mathcal{S})) \leq \varrho \cdot \log 1/(2\varepsilon)$  and conclude that (84) holds when

$$t \geq \left(\frac{1}{\rho}\right)^{\frac{4\varrho}{\gamma^2 \log \frac{1}{2\varepsilon}}}, \tag{85}$$

as claimed.

**Remark:** we can compare at this stage our guarantees to those of Kearns & Mansour (1996). The knowledge of their proofs immediately sheds light on the fact that our lowerbound on  $\Delta_{\underline{L}^Q}(q, \tau, \delta)$  in Lemma 10 does not depend on  $q$  whereas all of theirs do (Kearns & Mansour, 1996, Lemmata 5, 6, 7), and in fact vanish as  $q \rightarrow 0, 1$ . A closer look at the weak learning assumption shows that it in fact precludes this extreme regime for  $q$  as it enforces  $q \in [\tau\delta, 1 - (1 - \tau)\delta]$  when  $\delta \leq 1$ ; as a consequence their bounds can also be reformulated to exclude  $q$  and their convergence rate for their best splitting criterion is within the same order as ours.

## 7 Experiments *in extenso*

### 7.1 Implementation

We give here a few details on the implementation. The Java implementation of the algorithms, available separately, implements the version of Nock & Nielsen (2006); Schapire & Singer (1999) respectively for `ADABOOSTR` and `AdaBoost`.

The implementation of `RATBOOSTE` uses methods from class `Math` that allow to throw an `ArithmeticException` when a `long` overflow happens – in which case we catch the exception and redo the corresponding method after quantization. To make the code faster, we have also included the possibility to trigger quantization when the `long`s encoding length exceeds a user-fixed threshold.

The implementation of `RATBOOSTAb` uses a regular  $k$ -means with Forgy initialization. If you want to optimize this with your best hard clustering algorithm, you just have to rewrite a few methods from class `KMeans_R` in file `Misc.java`. Note that the implementation also allows to use stochastic weight assignation with adaptive quantization (a combination of `RATBOOSTAb` and `RATBOOSTQb`), but it is not reported (see `README`).

### Domain summary Table

Table 1 details the UCI domains we have used Blake et al. (1998). We now detail the per-domain training curves *when there is no stopping criterion* (other than to boost for 10 000 iterations). In the results reported in Tables 1 (main file) and 2 (this), we keep the classifier which minimizes the empirical risk among all iterations, which amounts to a cutoff point for boosting around the minimal values of each curve (because of the statistical uncertainty, we are not guarantee that this may be minimal on testing). Results of `ADABOOSTR` are omitted to not clutter the plots but they are included in the full Table 2.



| Domain               | $m$     | $d$ |
|----------------------|---------|-----|
| Fertility            | 100     | 9   |
| Haberman             | 306     | 3   |
| Transfusion          | 748     | 4   |
| Banknote             | 1 372   | 4   |
| Breast wisc          | 699     | 9   |
| Ionosphere           | 351     | 33  |
| Sonar                | 208     | 60  |
| Yeast                | 1 484   | 7   |
| Wine-red             | 1 599   | 11  |
| Cardiotocography (*) | 2 126   | 9   |
| CreditCardSmall (**) | 1 000   | 23  |
| Abalone              | 4 177   | 8   |
| Qsar                 | 1 055   | 41  |
| Wine-white           | 4 898   | 11  |
| Page                 | 5 473   | 10  |
| Mice                 | 1 080   | 77  |
| Hill+noise           | 1 212   | 100 |
| Hill+nonoise         | 1 212   | 100 |
| Firmteacher          | 10 800  | 16  |
| Magic                | 19 020  | 10  |
| EEG                  | 14 980  | 14  |
| Skin                 | 245 057 | 3   |
| Musk                 | 6 598   | 166 |
| Hardware             | 28 179  | 95  |
| Twitter (***)        | 583 250 | 77  |

Table 1: UCI domains considered in our experiments ( $m$  = total number of examples,  $d$  = number of features), ordered in increasing  $m \times d$ . (\*) we used features 13-21 as descriptors; (\*\*) we used the first 1 000 examples of the UCI domain; (\*\*\*) due to the size of the domain, only AdaBoost and ADABOOST<sub>R</sub> were run for  $T = 5000$  iterations, the other algorithms were run for a smaller  $T' = 1000$  iterations.

# UCI fertility

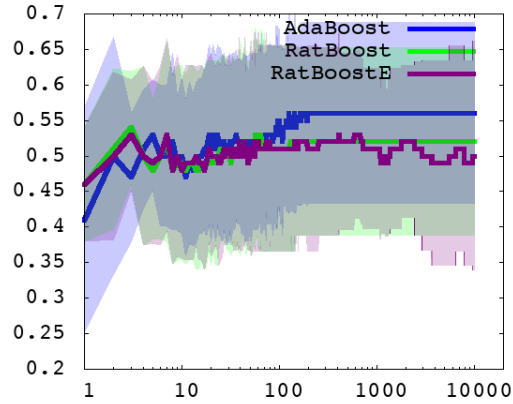

Figure 1: UCI domain fertility. Results comparing AdaBoost (blue), RATBOOST (green) and RATBOOSTE (purple). *Note*: there is *no* other stopping criterion apart from running for  $T = 10000$  iterations.

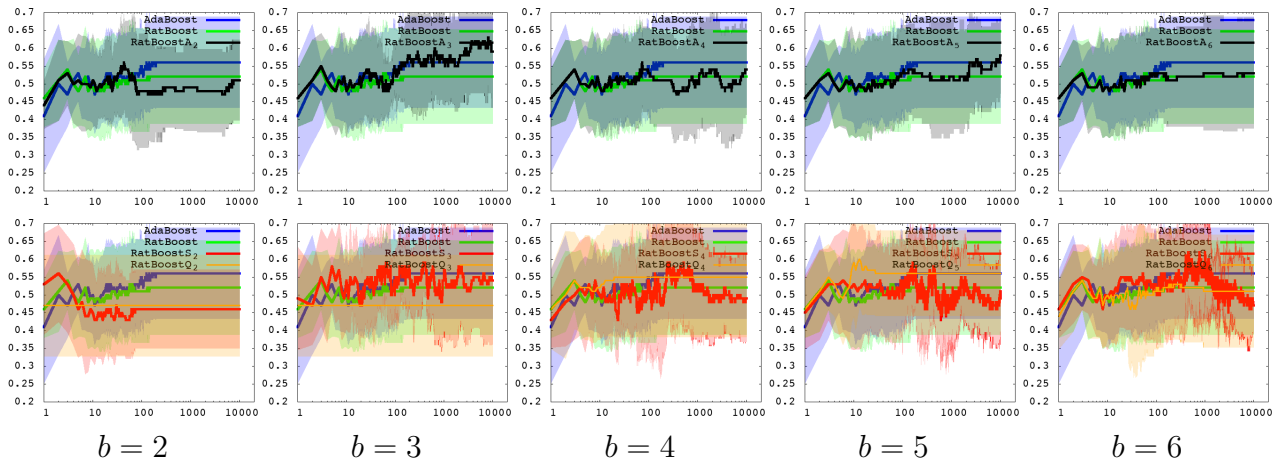

Figure 2: UCI domain fertility. Results comparing AdaBoost (blue), RATBOOST (green) and the quantized versions  $\text{RATBOOSTA}_b$  (black) /  $\text{RATBOOSTQ}_b$  (thin orange) /  $\text{RATBOOSTS}_b$  (red), for various values of the quantization index bit-size  $b$ . *Note*: there is *no* other stopping criterion apart from running for  $T = 10000$  iterations.

## UCI haberman

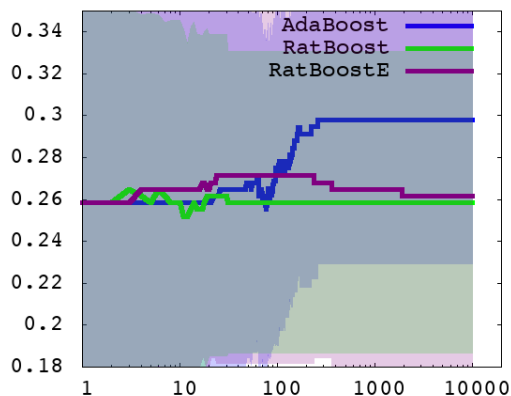

Figure 3: UCI domain haberman. Results comparing AdaBoost (blue), RATBOOST (green) and RATBOOSTE (purple). *Note*: there is *no* other stopping criterion apart from running for  $T = 10000$  iterations.

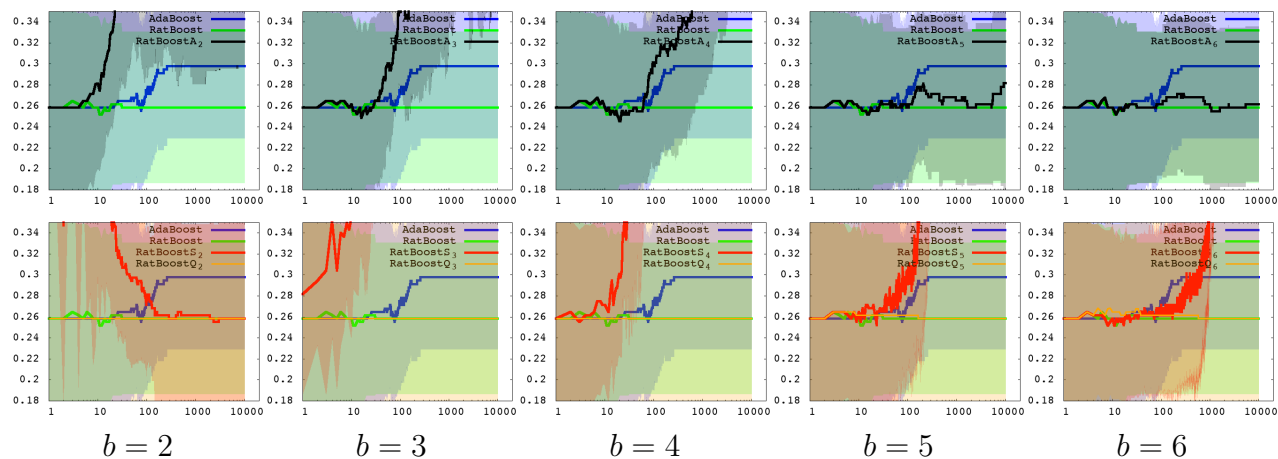

Figure 4: UCI domain haberman. Results comparing AdaBoost (blue), RATBOOST (green) and the quantized versions RATBOOSTA<sub>*b*</sub> (black) / RATBOOSTQ<sub>*b*</sub> (thin orange) / RATBOOSTS<sub>*b*</sub> (red), for various values of the quantization index bit-size  $b$ . *Note*: there is *no* other stopping criterion apart from running for  $T = 10000$  iterations.

## UCI transfusion

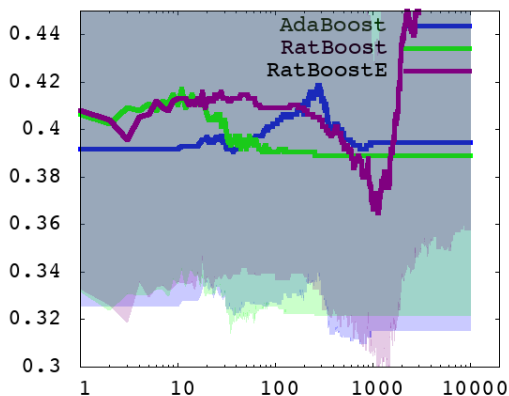

Figure 5: UCI domain transfusion. Results comparing AdaBoost (blue), RATBOOST (green) and RATBOOSTE (purple). *Note*: there is *no* other stopping criterion apart from running for  $T = 10000$  iterations.

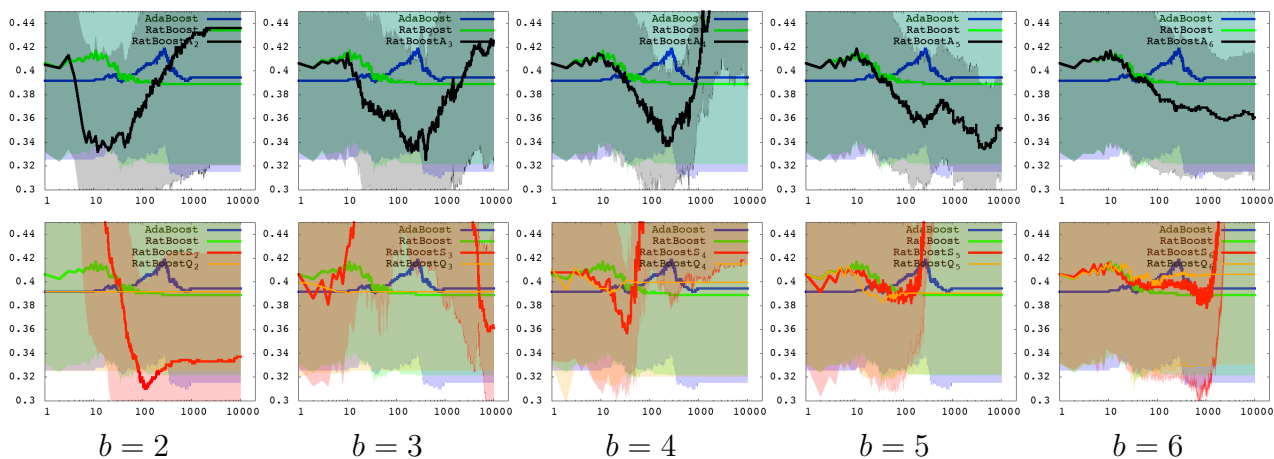

Figure 6: UCI domain transfusion. Results comparing AdaBoost (blue), RATBOOST (green) and the quantized versions RATBOOSTA<sub>*b*</sub> (black) / RATBOOSTQ<sub>*b*</sub> (thin orange) / RATBOOSTS<sub>*b*</sub> (red), for various values of the quantization index bit-size  $b$ . *Note*: there is *no* other stopping criterion apart from running for  $T = 10000$  iterations.

## UCI banknote

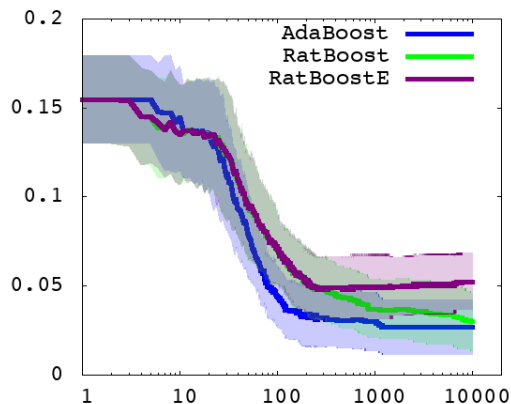

Figure 7: UCI domain banknote. Results comparing AdaBoost (blue), RATBOOST (green) and RATBOOSTE (purple). *Note*: there is *no* other stopping criterion apart from running for  $T = 10000$  iterations.

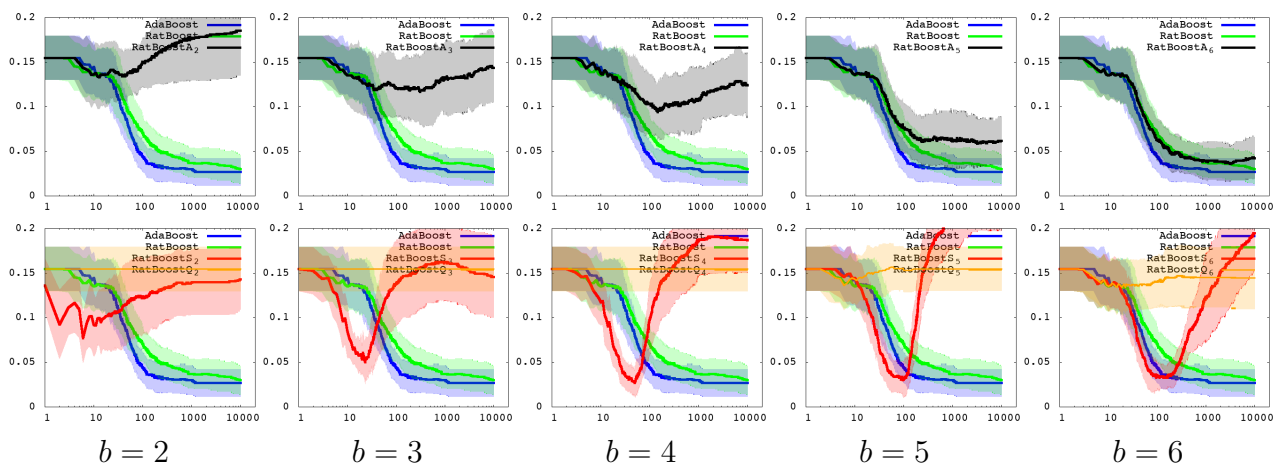

Figure 8: UCI domain banknote. Results comparing AdaBoost (blue), RATBOOST (green) and the quantized versions RATBOOSTA<sub>b</sub> (black) / RATBOOSTQ<sub>b</sub> (thin orange) / RATBOOSTS<sub>b</sub> (red), for various values of the quantization index bit-size  $b$ . *Note*: there is *no* other stopping criterion apart from running for  $T = 10000$  iterations.

## UCI breastwisc

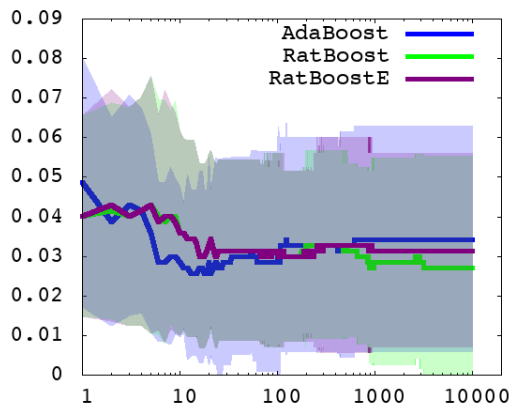

Figure 9: UCI domain breastwisc. Results comparing AdaBoost (blue), RATBOOST (green) and RATBOOSTE (purple). *Note*: there is *no* other stopping criterion apart from running for  $T = 10000$  iterations.

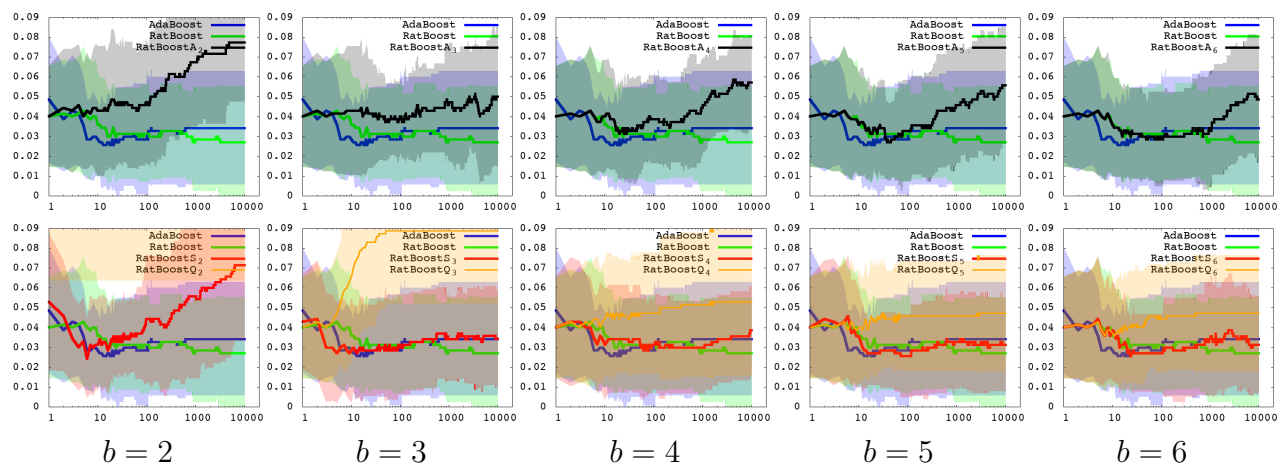

Figure 10: UCI domain breastwisc. Results comparing AdaBoost (blue), RATBOOST (green) and the quantized versions RATBOOSTA<sub>b</sub> (black) / RATBOOSTQ<sub>b</sub> (thin orange) / RATBOOSTS<sub>b</sub> (red), for various values of the quantization index bit-size  $b$ . *Note*: there is *no* other stopping criterion apart from running for  $T = 10000$  iterations.

## UCI ionosphere

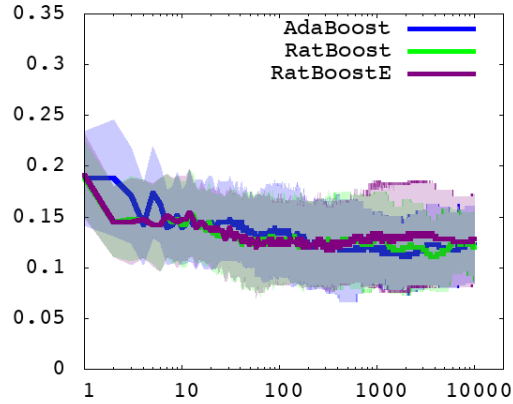

Figure 11: UCI domain ionosphere. Results comparing AdaBoost (blue), RATBOOST (green) and RATBOOSTE (purple). *Note*: there is *no* other stopping criterion apart from running for  $T = 10000$  iterations.

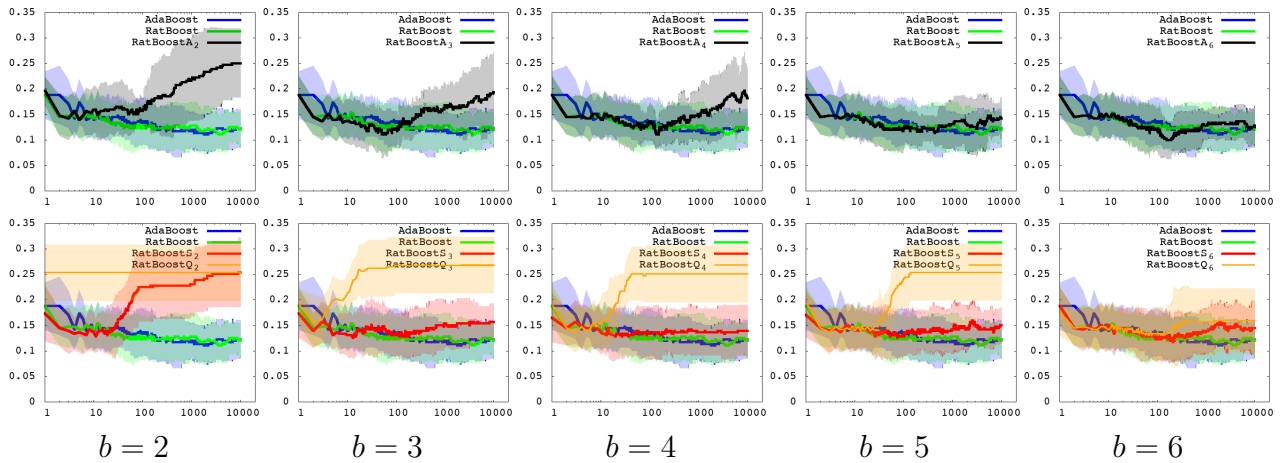

Figure 12: UCI domain ionosphere. Results comparing AdaBoost (blue), RATBOOST (green) and the quantized versions RATBOOSTA<sub>b</sub> (black) / RATBOOSTQ<sub>b</sub> (thin orange) / RATBOOSTS<sub>b</sub> (red), for various values of the quantization index bit-size  $b$ . *Note*: there is *no* other stopping criterion apart from running for  $T = 10000$  iterations.

## UCI sonar

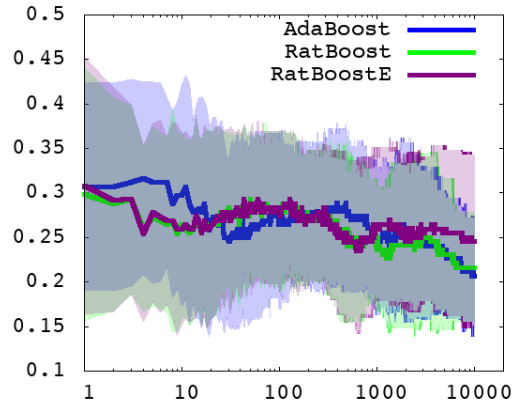

Figure 13: UCI domain `sonar`. Results comparing AdaBoost (blue), RATBOOST (green) and RATBOOSTE (purple). *Note*: there is *no* other stopping criterion apart from running for  $T = 10000$  iterations.

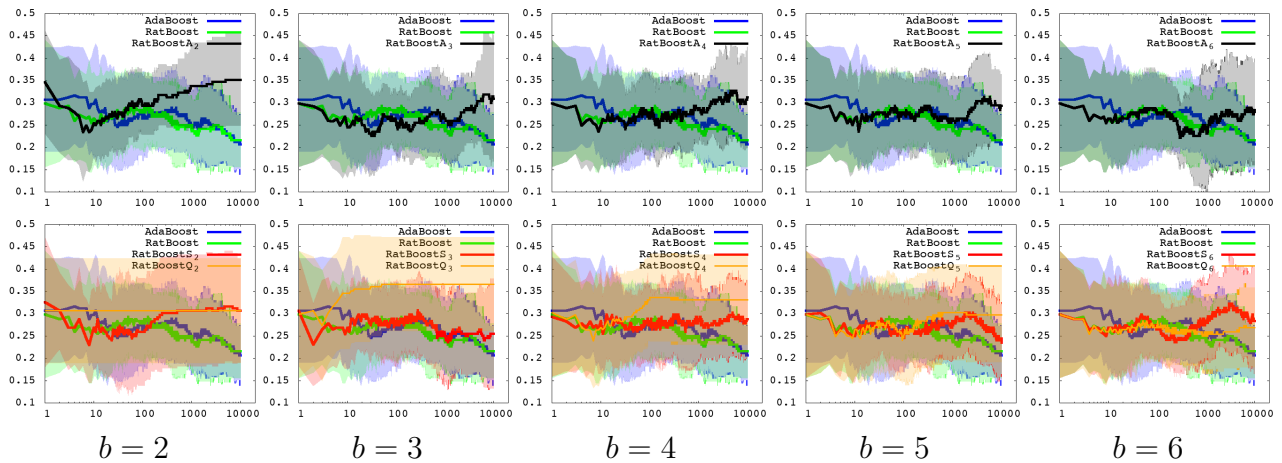

Figure 14: UCI domain `sonar`. Results comparing AdaBoost (blue), RATBOOST (green) and the quantized versions RATBOOSTA<sub>*b*</sub> (black) / RATBOOSTQ<sub>*b*</sub> (thin orange) / RATBOOSTS<sub>*b*</sub> (red), for various values of the quantization index bit-size  $b$ . *Note*: there is *no* other stopping criterion apart from running for  $T = 10000$  iterations.



## UCI yeast

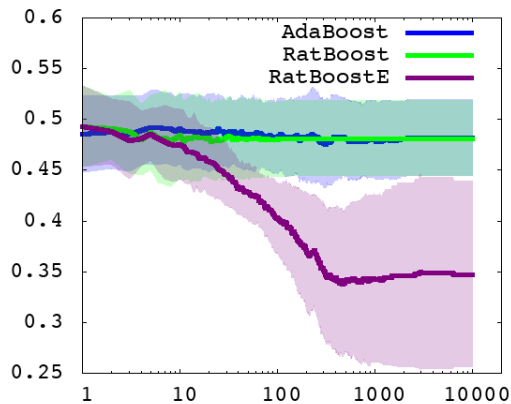

Figure 15: UCI domain yeast. Results comparing AdaBoost (blue), RATBOOST (green) and RATBOOSTE (purple). *Note*: there is *no* other stopping criterion apart from running for  $T = 10000$  iterations.

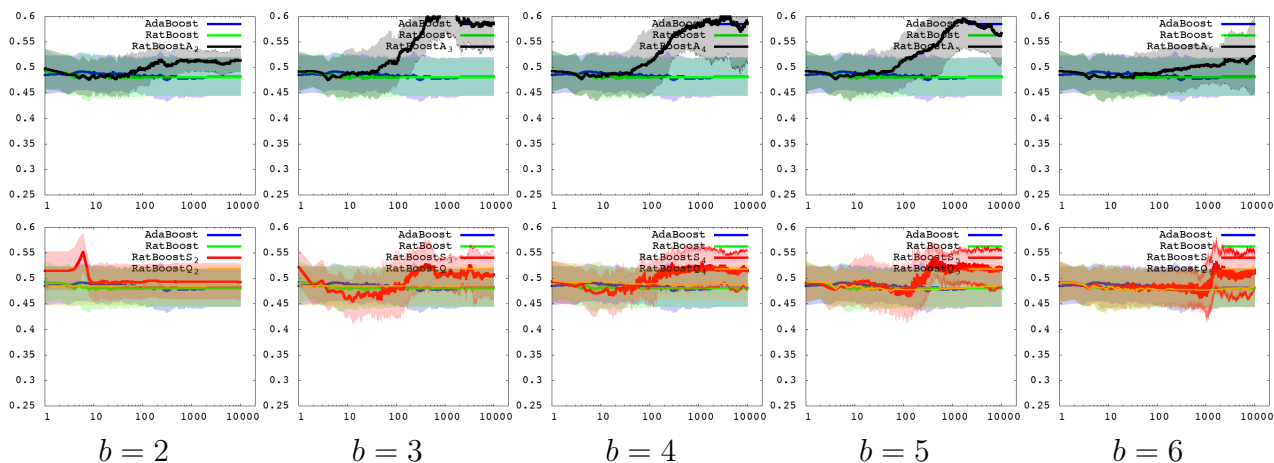

Figure 16: UCI domain yeast. Results comparing AdaBoost (blue), RATBOOST (green) and the quantized versions RATBOOSTA<sub>b</sub> (black) / RATBOOSTQ<sub>b</sub> (thin orange) / RATBOOSTS<sub>b</sub> (red), for various values of the quantization index bit-size  $b$ . *Note*: there is *no* other stopping criterion apart from running for  $T = 10000$  iterations.

## UCI winered

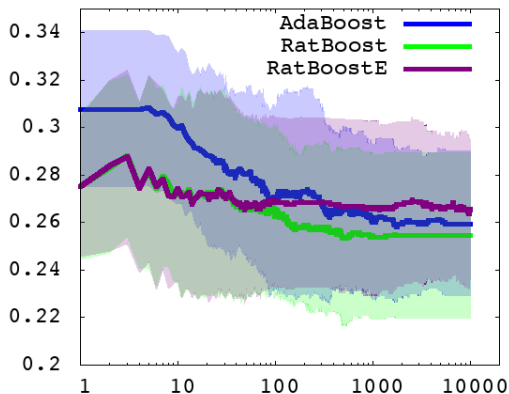

Figure 17: UCI domain winered. Results comparing AdaBoost (blue), RATBOOST (green) and RATBOOSTE (purple). *Note: there is no other stopping criterion apart from running for  $T = 10000$  iterations.*

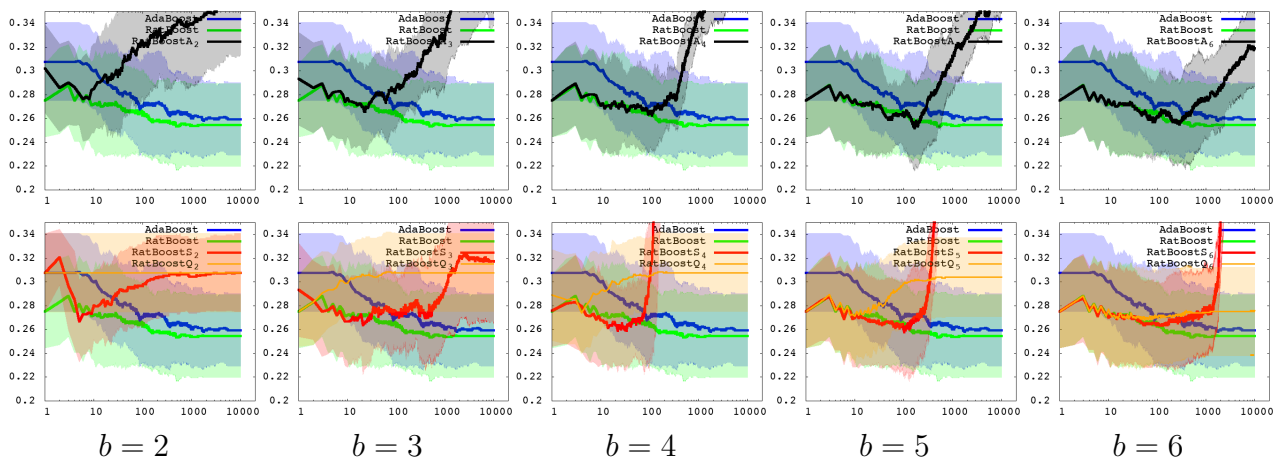

Figure 18: UCI domain winered. Results comparing AdaBoost (blue), RATBOOST (green) and the quantized versions RATBOOSTA<sub>b</sub> (black) / RATBOOSTQ<sub>b</sub> (thin orange) / RATBOOSTS<sub>b</sub> (red), for various values of the quantization index bit-size  $b$ . *Note: there is no other stopping criterion apart from running for  $T = 10000$  iterations.*

## UCI cardiocography

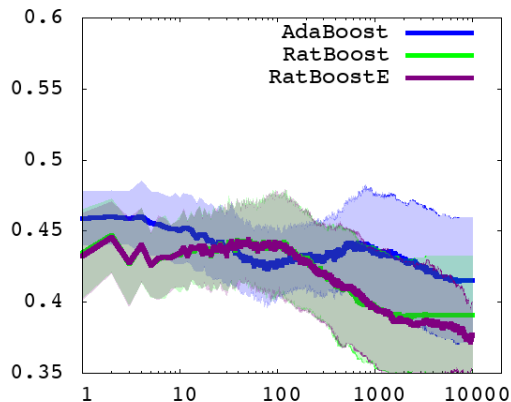

Figure 19: UCI domain cardiocography. Results comparing AdaBoost (blue), RAT-BOOST (green) and RATBOOSTE (purple). *Note*: there is *no* other stopping criterion apart from running for  $T = 10000$  iterations.

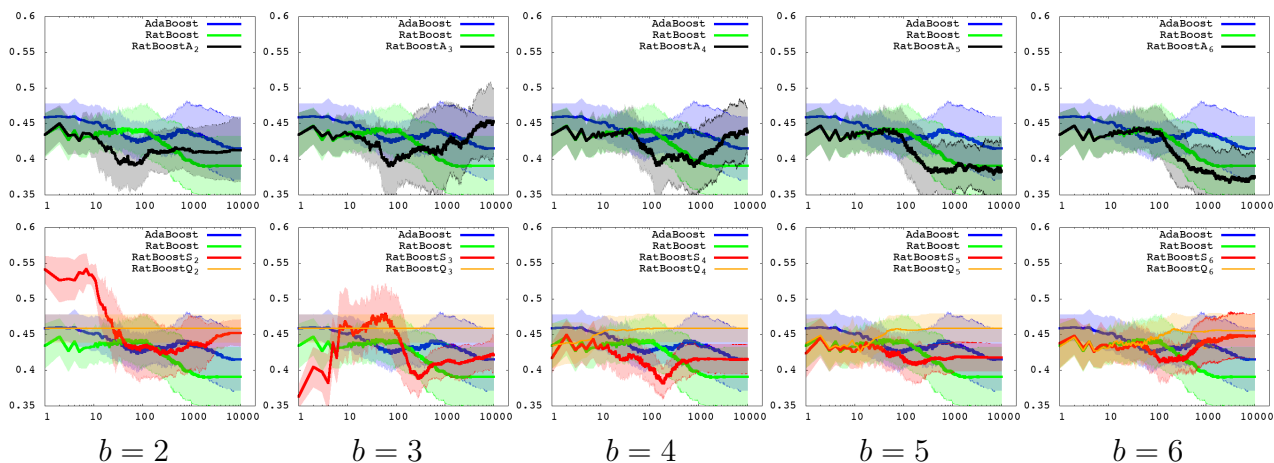

Figure 20: UCI domain cardiocography. Results comparing AdaBoost (blue), RAT-BOOST (green) and the quantized versions RATBOOSTA <sub>$b$</sub>  (black) / RATBOOSTQ <sub>$b$</sub>  (thin orange) / RATBOOSTS <sub>$b$</sub>  (red), for various values of the quantization index bit-size  $b$ . *Note*: there is *no* other stopping criterion apart from running for  $T = 10000$  iterations.

## UCI CreditCardSmall

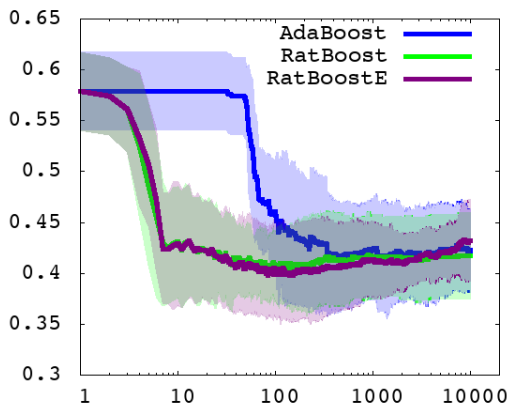

Figure 21: UCI domain `creditcardsmall`. Results comparing AdaBoost (blue), RAT-BOOST (green) and RATBOOSTE (purple). *Note*: there is *no* other stopping criterion apart from running for  $T = 10000$  iterations.

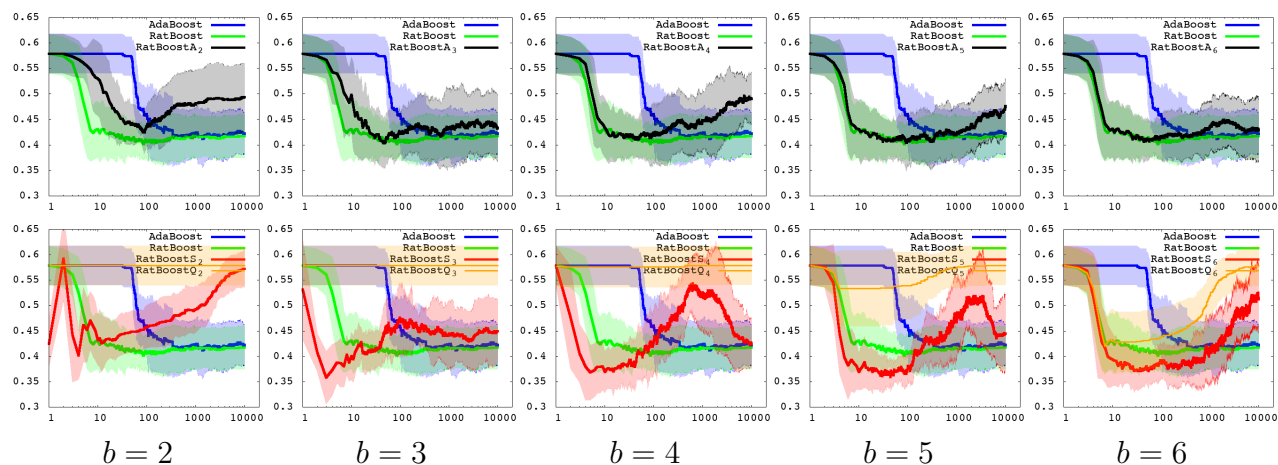

Figure 22: UCI domain `creditcardsmall`. Results comparing AdaBoost (blue), RAT-BOOST (green) and the quantized versions RATBOOSTA<sub>*b*</sub> (black) / RATBOOSTQ<sub>*b*</sub> (thin orange) / RATBOOSTS<sub>*b*</sub> (red), for various values of the quantization index bit-size  $b$ . *Note*: there is *no* other stopping criterion apart from running for  $T = 10000$  iterations.

## UCI abalone

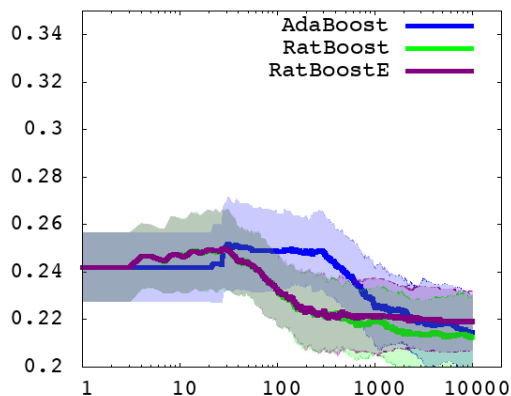

Figure 23: UCI domain abalone. Results comparing AdaBoost (blue), RATBOOST (green) and RATBOOSTE (purple). *Note: there is no other stopping criterion apart from running for  $T = 10000$  iterations.*

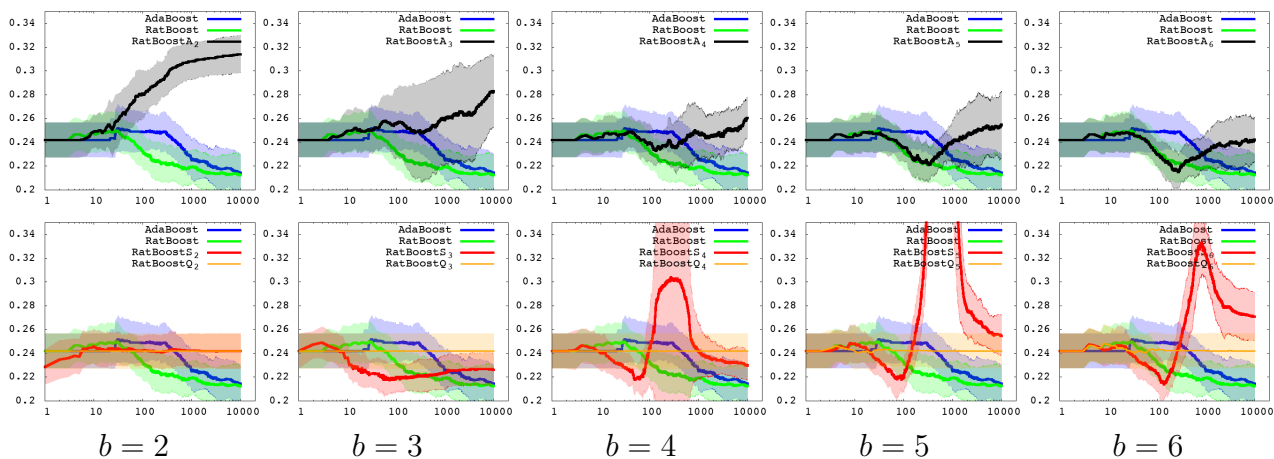

Figure 24: UCI domain abalone. Results comparing AdaBoost (blue), RATBOOST (green) and the quantized versions RATBOOSTA<sub>*b*</sub> (black) / RATBOOSTQ<sub>*b*</sub> (thin orange) / RATBOOSTS<sub>*b*</sub> (red), for various values of the quantization index bit-size  $b$ . *Note: there is no other stopping criterion apart from running for  $T = 10000$  iterations.*

# UCI $qsar$

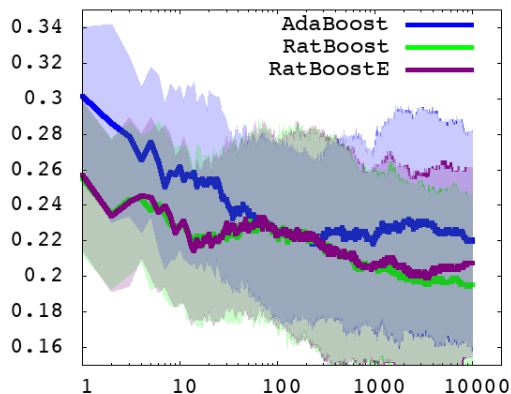

Figure 25: UCI domain  $qsar$ . Results comparing AdaBoost (blue), RATBOOST (green) and RATBOOSTE (purple). *Note*: there is *no* other stopping criterion apart from running for  $T = 10000$  iterations.

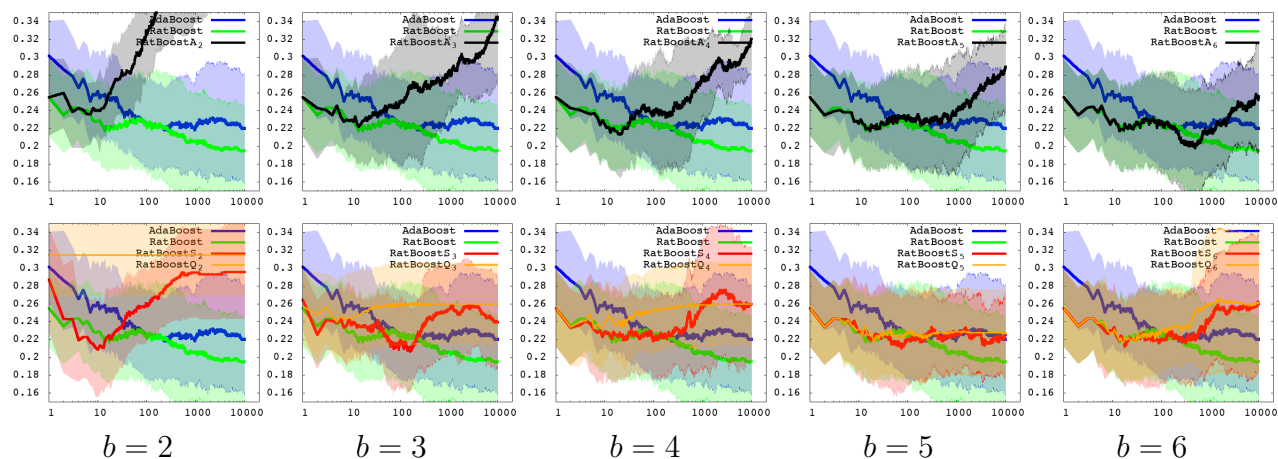

Figure 26: UCI domain  $qsar$ . Results comparing AdaBoost (blue), RATBOOST (green) and the quantized versions RATBOOSTA $_b$  (black) / RATBOOSTQ $_b$  (thin orange) / RATBOOSTS $_b$  (red), for various values of the quantization index bit-size  $b$ . *Note*: there is *no* other stopping criterion apart from running for  $T = 10000$  iterations.

## UCI winewhite

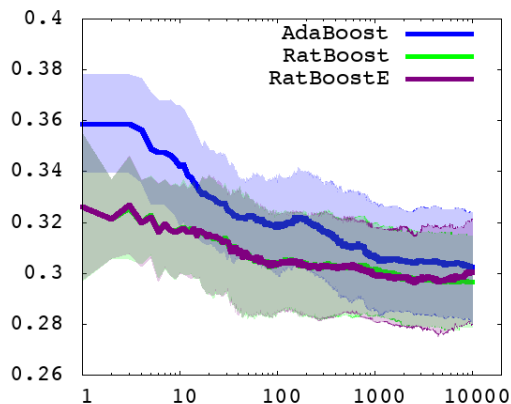

Figure 27: UCI domain winewhite. Results comparing AdaBoost (blue), RATBOOST (green) and RATBOOSTE (purple). *Note*: there is *no* other stopping criterion apart from running for  $T = 10000$  iterations.

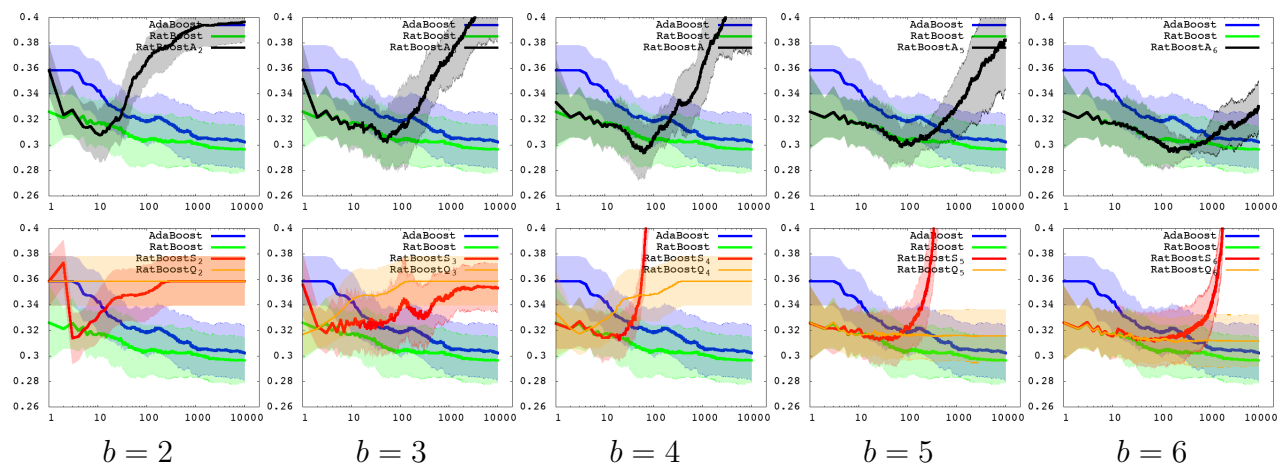

Figure 28: UCI domain winewhite. Results comparing AdaBoost (blue), RATBOOST (green) and the quantized versions RATBOOSTA<sub>b</sub> (black) / RATBOOSTQ<sub>b</sub> (thin orange) / RATBOOSTS<sub>b</sub> (red), for various values of the quantization index bit-size  $b$ . *Note*: there is *no* other stopping criterion apart from running for  $T = 10000$  iterations.

## UCI page

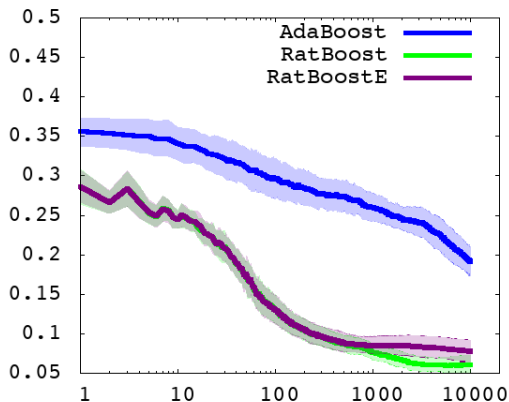

Figure 29: UCI domain page. Results comparing AdaBoost (blue), RATBOOST (green) and RATBOOSTE (purple). *Note: there is no other stopping criterion apart from running for  $T = 10000$  iterations.*

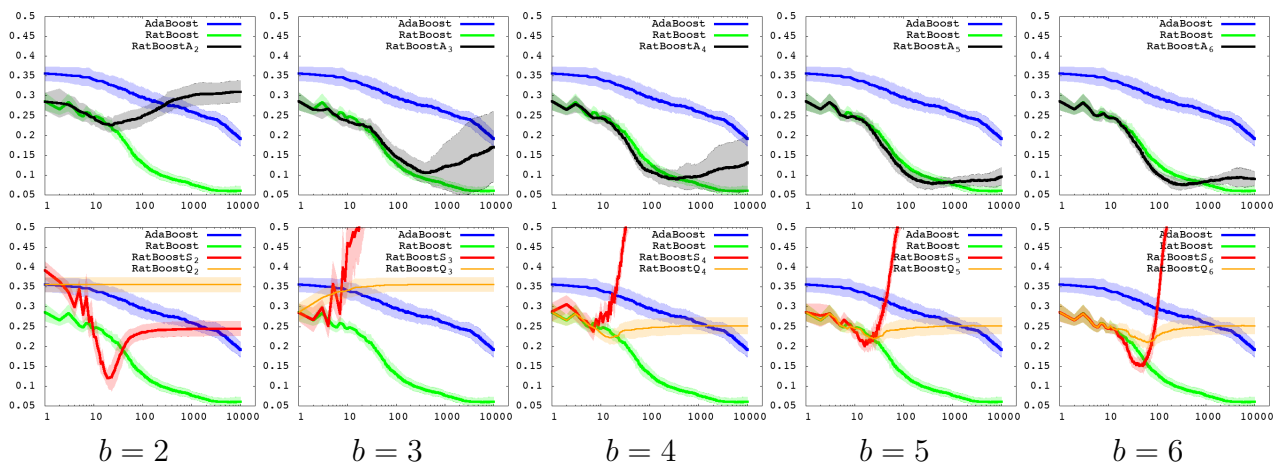

Figure 30: UCI domain page. Results comparing AdaBoost (blue), RATBOOST (green) and the quantized versions RATBOOSTA $_b$  (black) / RATBOOSTQ $_b$  (thin orange) / RATBOOSTS $_b$  (red), for various values of the quantization index bit-size  $b$ . *Note: there is no other stopping criterion apart from running for  $T = 10000$  iterations.*



# UCI mice

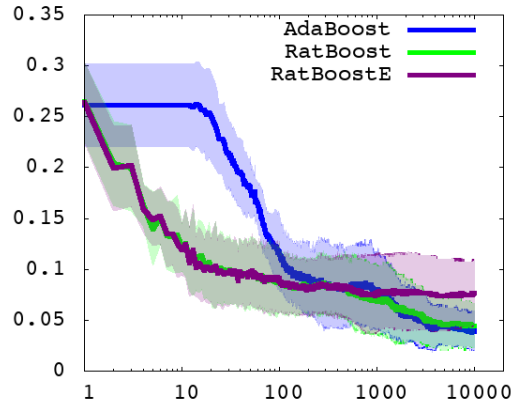

Figure 31: UCI domain mice. Results comparing AdaBoost (blue), RATBOOST (green) and RATBOOSTE (purple). *Note: there is no other stopping criterion apart from running for  $T = 10000$  iterations.*

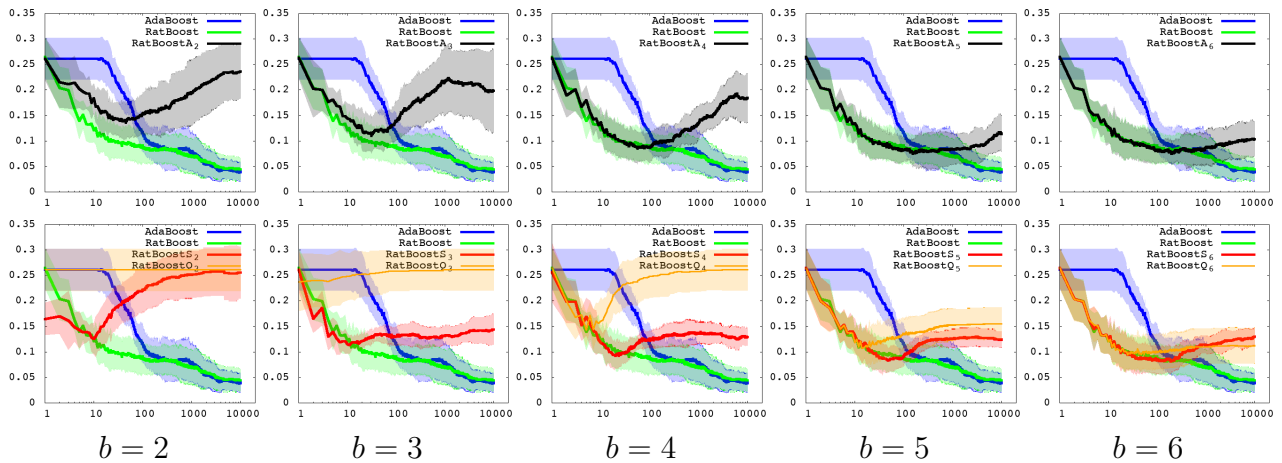

Figure 32: UCI domain mice. Results comparing AdaBoost (blue), RATBOOST (green) and the quantized versions RATBOOSTA<sub>b</sub> (black) / RATBOOSTQ<sub>b</sub> (thin orange) / RATBOOSTS<sub>b</sub> (red), for various values of the quantization index bit-size  $b$ . *Note: there is no other stopping criterion apart from running for  $T = 10000$  iterations.*

## UCI hill+noise

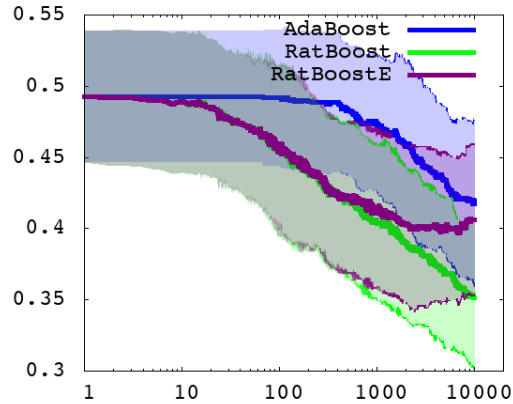

Figure 33: UCI domain hill+noise. Results comparing AdaBoost (blue), RATBOOST (green) and RATBOOSTE (purple). *Note*: there is *no* other stopping criterion apart from running for  $T = 10000$  iterations.

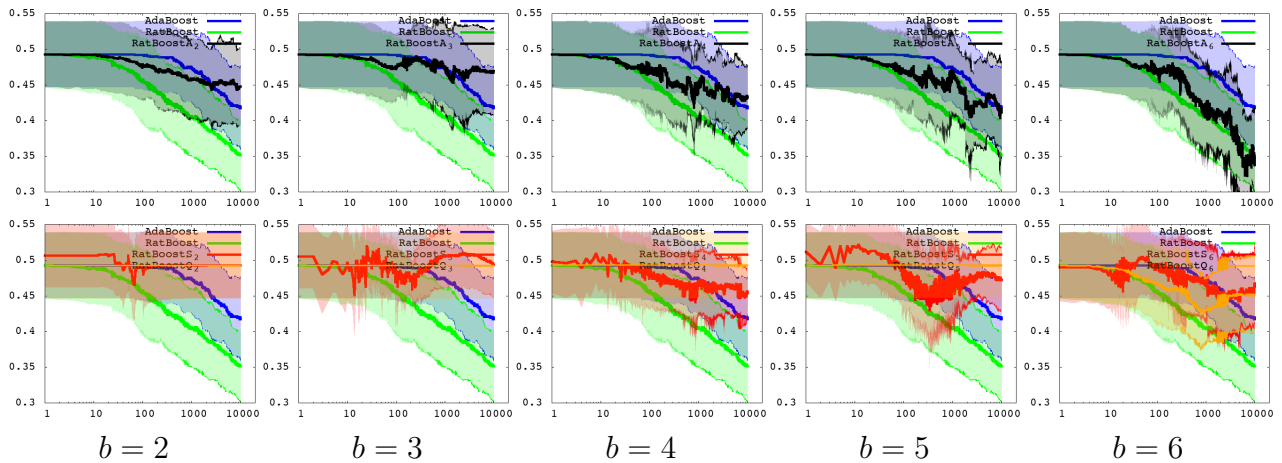

Figure 34: UCI domain hill+noise. Results comparing AdaBoost (blue), RATBOOST (green) and the quantized versions RATBOOSTA<sub>*b*</sub> (black) / RATBOOSTQ<sub>*b*</sub> (thin orange) / RATBOOSTS<sub>*b*</sub> (red), for various values of the quantization index bit-size  $b$ . *Note*: there is *no* other stopping criterion apart from running for  $T = 10000$  iterations.

## UCI hill+noise

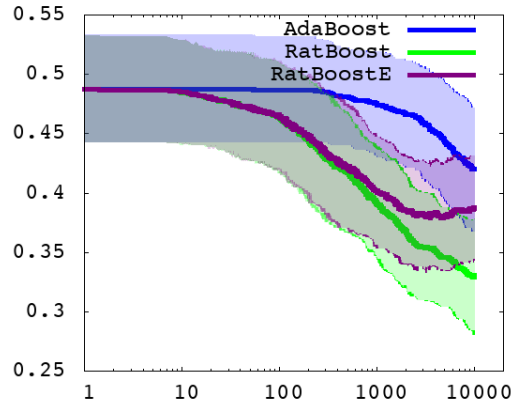

Figure 35: UCI domain hill+noise. Results comparing AdaBoost (blue), RATBOOST (green) and RATBOOSTE (purple). *Note*: there is *no* other stopping criterion apart from running for  $T = 10000$  iterations.

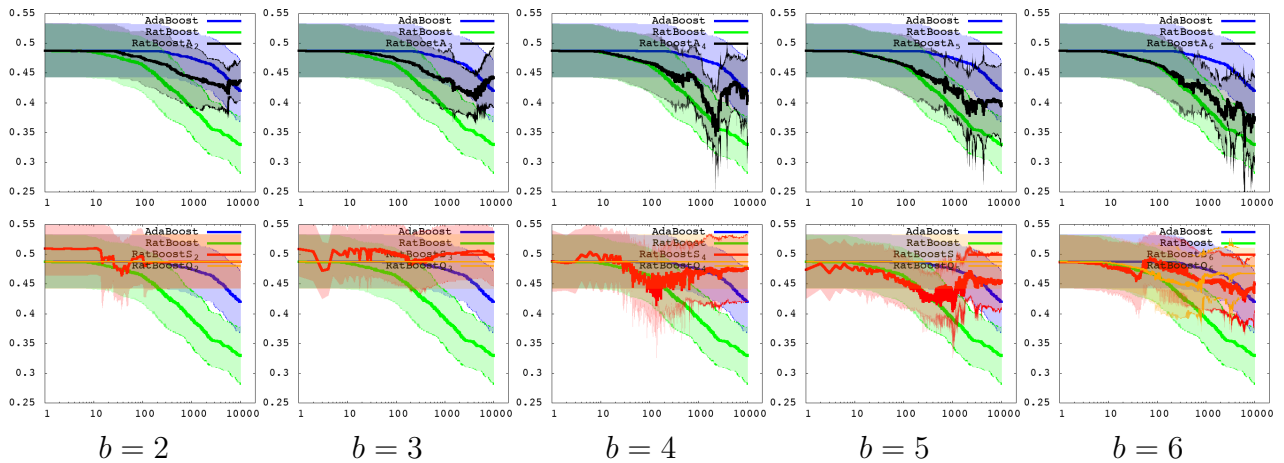

Figure 36: UCI domain hill+noise. Results comparing AdaBoost (blue), RATBOOST (green) and the quantized versions RATBOOSTA<sub>b</sub> (black) / RATBOOSTQ<sub>b</sub> (thin orange) / RATBOOSTS<sub>b</sub> (red), for various values of the quantization index bit-size  $b$ . *Note*: there is *no* other stopping criterion apart from running for  $T = 10000$  iterations.

## UCI firmteacher

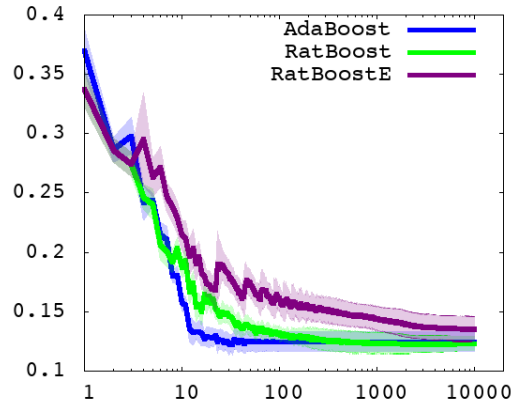

Figure 37: UCI domain `firmteacher`. Results comparing AdaBoost (blue), RATBOOST (green) and RATBOOSTE (purple). *Note*: there is *no* other stopping criterion apart from running for  $T = 10000$  iterations.

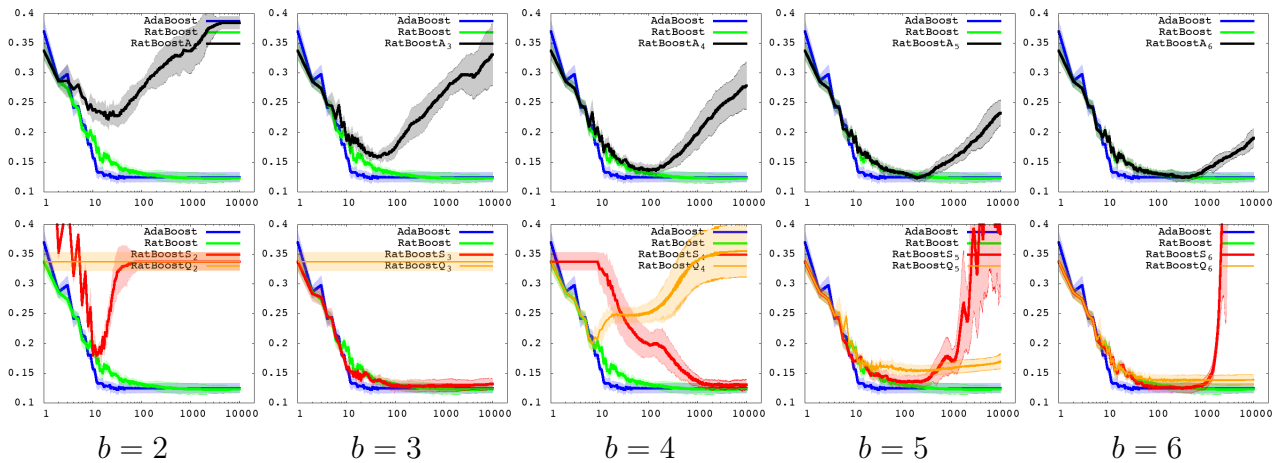

Figure 38: UCI domain `firmteacher`. Results comparing AdaBoost (blue), RATBOOST (green) and the quantized versions RATBOOSTA <sub>$b$</sub>  (black) / RATBOOSTQ <sub>$b$</sub>  (thin orange) / RATBOOSTS <sub>$b$</sub>  (red), for various values of the quantization index bit-size  $b$ . *Note*: there is *no* other stopping criterion apart from running for  $T = 10000$  iterations.

## UCI magic

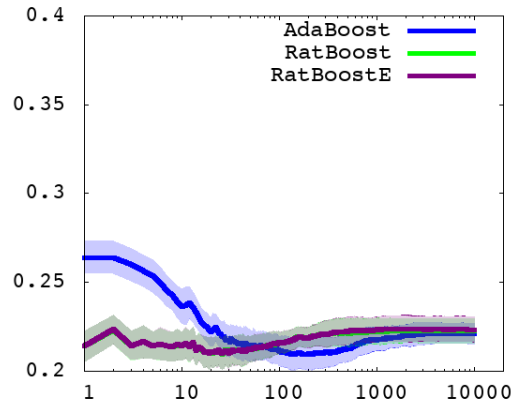

Figure 39: UCI domain magic. Results comparing AdaBoost (blue), RATBOOST (green) and RATBOOSTE (purple). *Note*: there is *no* other stopping criterion apart from running for  $T = 10000$  iterations.

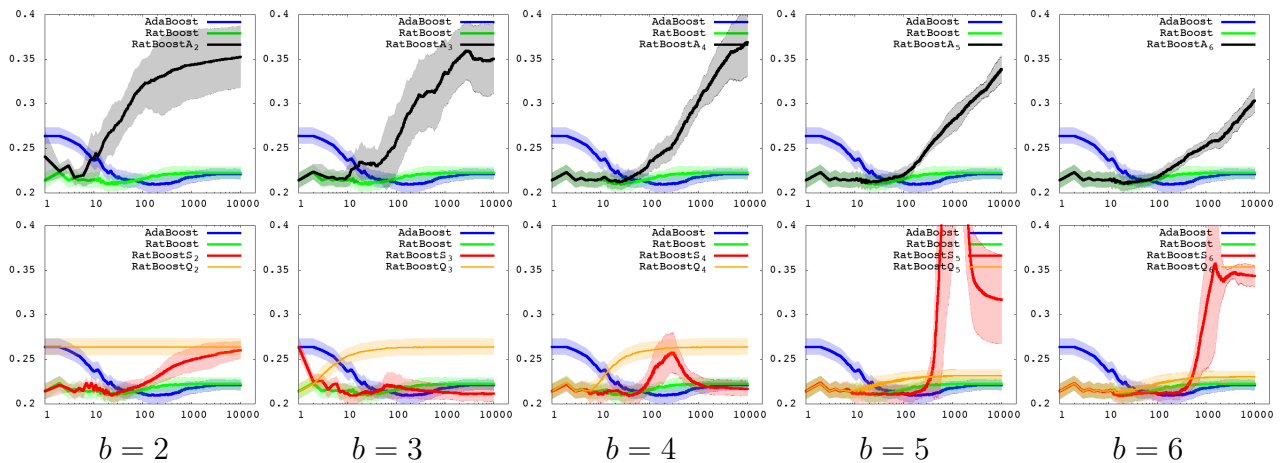

Figure 40: UCI domain magic. Results comparing AdaBoost (blue), RATBOOST (green) and the quantized versions RATBOOSTA<sub>*b*</sub> (black) / RATBOOSTQ<sub>*b*</sub> (thin orange) / RATBOOSTS<sub>*b*</sub> (red), for various values of the quantization index bit-size  $b$ . *Note*: there is *no* other stopping criterion apart from running for  $T = 10000$  iterations.

## UCI eeg

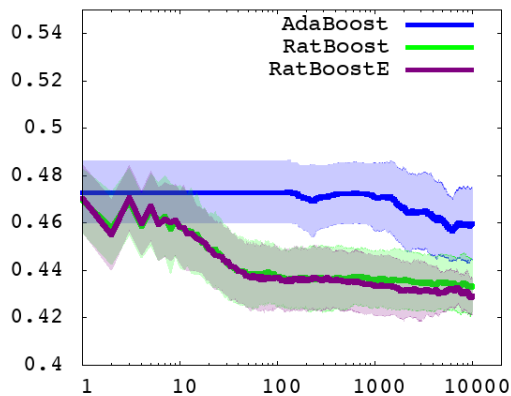

Figure 41: UCI domain eeg. Results comparing AdaBoost (blue), RATBOOST (green) and RATBOOSTE (purple). *Note*: there is *no* other stopping criterion apart from running for  $T = 10000$  iterations.

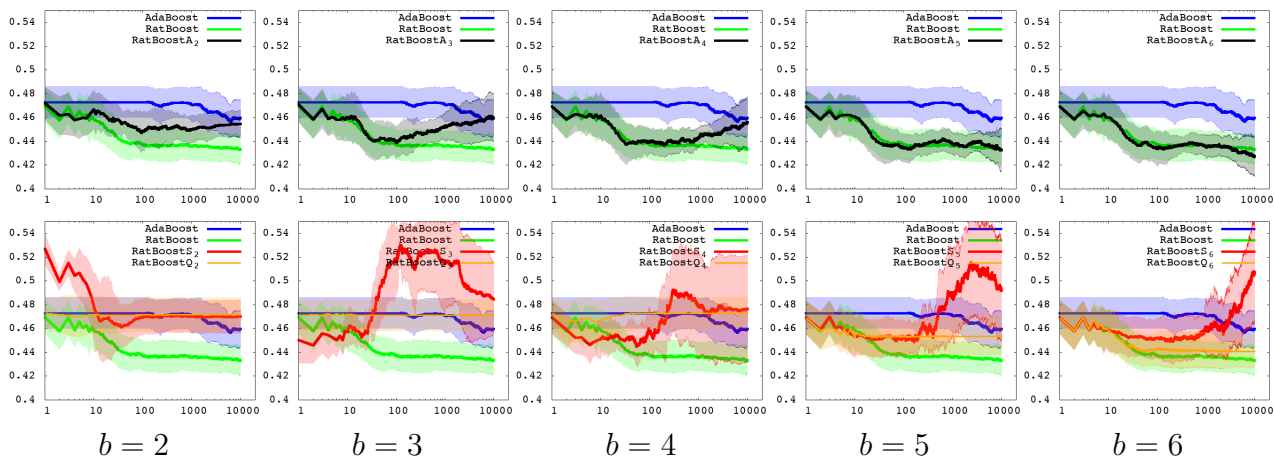

Figure 42: UCI domain eeg. Results comparing AdaBoost (blue), RATBOOST (green) and the quantized versions RATBOOSTA <sub>$b$</sub>  (black) / RATBOOSTQ <sub>$b$</sub>  (thin orange) / RATBOOSTS <sub>$b$</sub>  (red), for various values of the quantization index bit-size  $b$ . *Note*: there is *no* other stopping criterion apart from running for  $T = 10000$  iterations.

## UCI skin

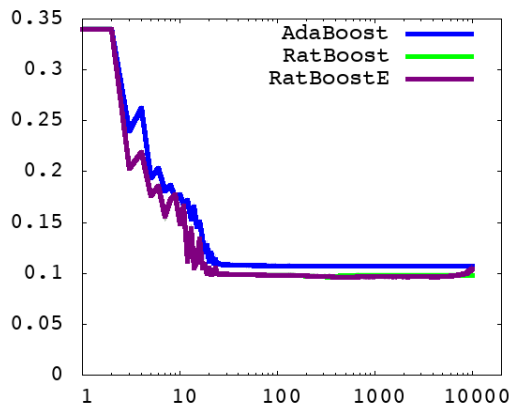

Figure 43: UCI domain *skin*. Results comparing AdaBoost (blue), RATBOOST (green) and RATBOOSTE (purple). *Note*: there is *no* other stopping criterion apart from running for  $T = 10000$  iterations.

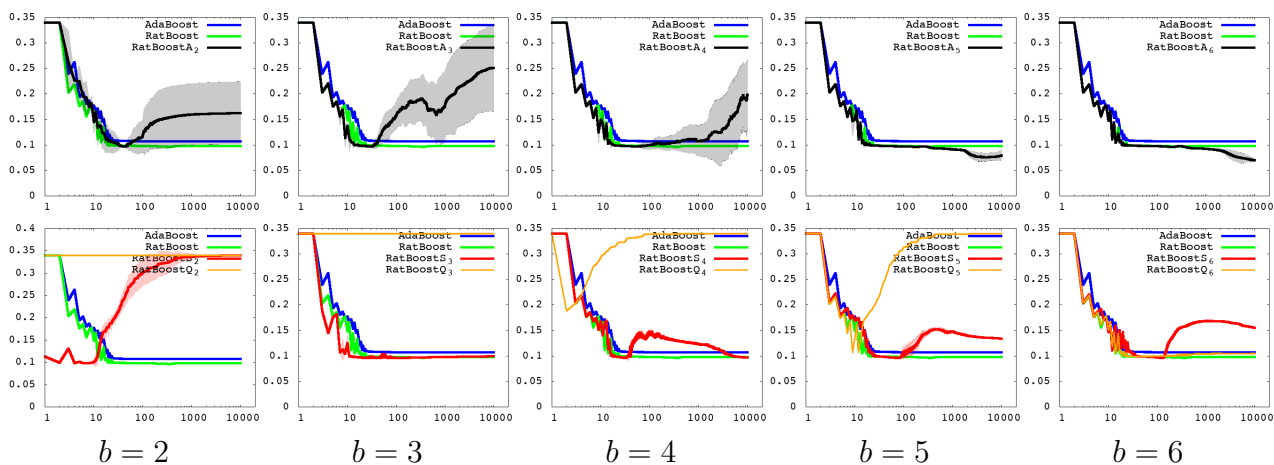

Figure 44: UCI domain *skin*. Results comparing AdaBoost (blue), RATBOOST (green) and the quantized versions RATBOOSTA<sub>b</sub> (black) / RATBOOSTQ<sub>b</sub> (thin orange) / RATBOOSTS<sub>b</sub> (red), for various values of the quantization index bit-size  $b$ . *Note*: there is *no* other stopping criterion apart from running for  $T = 10000$  iterations.

## UCI musk

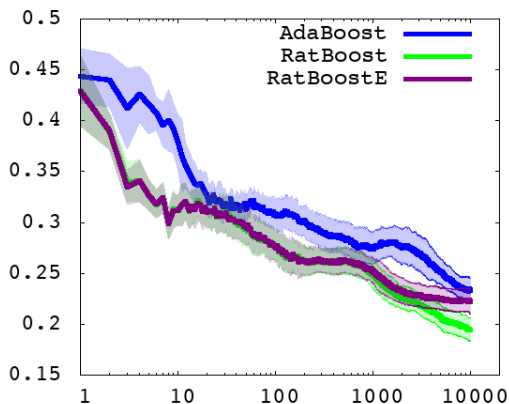

Figure 45: UCI domain musk. Results comparing AdaBoost (blue), RATBOOST (green) and RATBOOSTE (purple). *Note: there is no other stopping criterion apart from running for  $T = 10000$  iterations.*

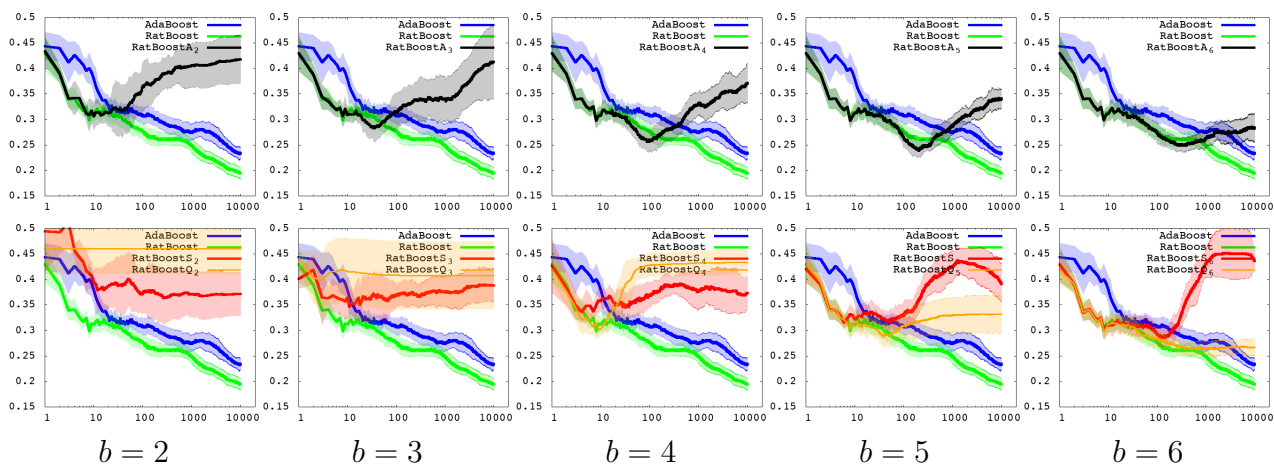

Figure 46: UCI domain musk. Results comparing AdaBoost (blue), RATBOOST (green) and the quantized versions RATBOOSTA <sub>$b$</sub>  (black) / RATBOOSTQ <sub>$b$</sub>  (thin orange) / RATBOOSTS <sub>$b$</sub>  (red), for various values of the quantization index bit-size  $b$ . *Note: there is no other stopping criterion apart from running for  $T = 10000$  iterations.*



## UCI hardware

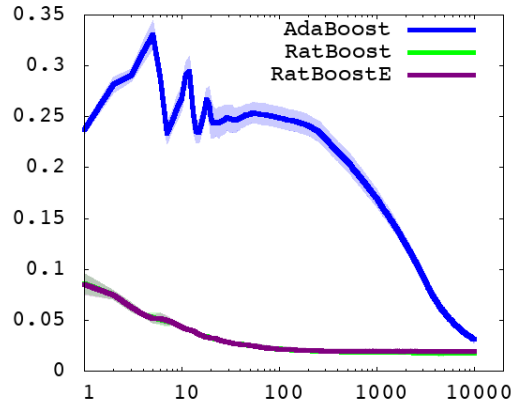

Figure 47: UCI domain hardware. Results comparing AdaBoost (blue), RATBOOST (green) and RATBOOSTE (purple). *Note: there is no other stopping criterion apart from running for  $T = 10000$  iterations.*

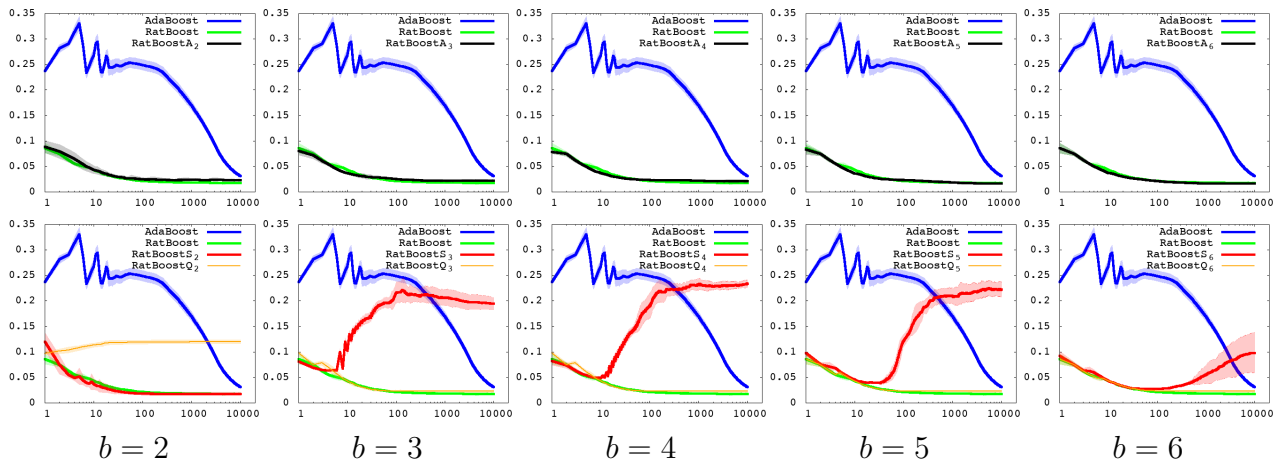

Figure 48: UCI domain hardware. Results comparing AdaBoost (blue), RATBOOST (green) and the quantized versions RATBOOSTA<sub>b</sub> (black) / RATBOOSTQ<sub>b</sub> (thin orange) / RATBOOSTS<sub>b</sub> (red), for various values of the quantization index bit-size  $b$ . *Note: there is no other stopping criterion apart from running for  $T = 10000$  iterations.*

# UCI twitter

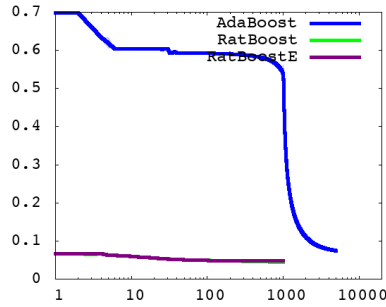

Figure 49: UCI domain twitter. Results comparing AdaBoost (blue), RATBOOST (green) and RATBOOSTE (purple). *Note*: there is *no* other stopping criterion apart from running for  $T = 5000$  iterations (AdaBoost) and  $T' = 1000$  iterations (RATBOOST, RATBOOSTE).

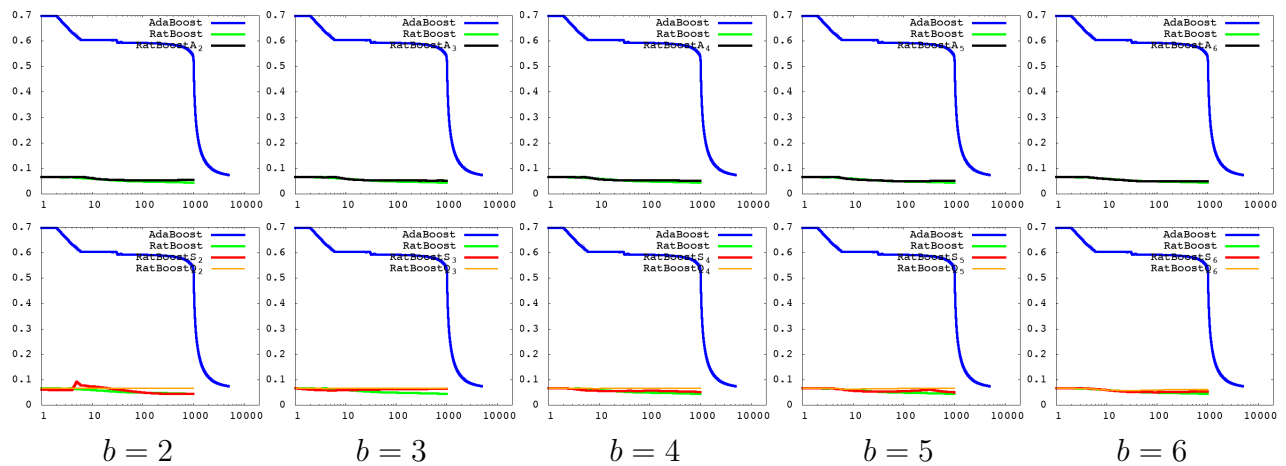

Figure 50: UCI domain twitter. Results comparing AdaBoost (blue), RATBOOST (green) and the quantized versions RATBOOSTA<sub>b</sub> (black) / RATBOOSTQ<sub>b</sub> (thin orange) / RATBOOSTS<sub>b</sub> (red), for various values of the quantization index bit-size  $b$ . *Note*: there is *no* other stopping criterion apart from running for  $T = 5000$  iterations (AdaBoost) and  $T' = 1000$  iterations (RATBOOST, RATBOOSTA<sub>b</sub>, RATBOOSTQ<sub>b</sub>, RATBOOSTS<sub>b</sub>).

## Summary of Results

## References

- Blake, C. L., Keogh, E., and Merz, C. UCI repository of machine learning databases, 1998.  
<http://www.ics.uci.edu/~mllearn/MLRepository.html>.
- Buja, A., Stuetzle, W., and Shen, Y. Loss functions for binary class probability estimation and classification: structure and applications, 2005. Technical Report, University of Pennsylvania.
- Kearns, M. and Mansour, Y. On the boosting ability of top-down decision tree learning algorithms. In *Proc. of the 28<sup>th</sup> ACM STOC*, pp. 459–468, 1996.
- Kearns, M. J. and Mansour, Y. A Fast, Bottom-up Decision Tree Pruning algorithm with Near-Optimal generalization. In *Proc. of the 15<sup>th</sup> International Conference on Machine Learning*, pp. 269–277, 1998.
- Nock, R. and Nielsen, F. A Real Generalization of discrete AdaBoost. In *Proc. of the 17<sup>th</sup> European Conference on Artificial Intelligence*, pp. 509–515, 2006.
- Nock, R. and Nielsen, F. On the efficient minimization of classification-calibrated surrogates. In *NIPS\*21*, pp. 1201–1208, 2008.
- Reid, M.-D. and Williamson, R.-C. Composite binary losses. *JMLR*, 11:2387–2422, 2010.
- Schapire, R. E. and Singer, Y. Improved boosting algorithms using confidence-rated predictions. *MLJ*, 37:297–336, 1999.
- Schervish, M.-J. A general method for comparing probability assessors. *Ann. of Stat.*, 17(4): 1856–1879, 1989.
- Shuford, Jr, E.-H., Albert, A., and Massengil, H.-E. Admissible probability measurement procedures. *Psychometrika*, 31:125–145, 1966.

|     | AdaBoost <sub>a</sub> |            |             |             |             |             | RATBoost <sub>Q<sub>a</sub></sub> , b = |             |            |             |             |            | RATBoost <sub>S<sub>a</sub></sub> , b = |             |             |            |   |   | RATBoost <sub>A<sub>a</sub></sub> , b = |   |   |   |  |  |
|-----|-----------------------|------------|-------------|-------------|-------------|-------------|-----------------------------------------|-------------|------------|-------------|-------------|------------|-----------------------------------------|-------------|-------------|------------|---|---|-----------------------------------------|---|---|---|--|--|
|     | 2                     | 3          | 4           | 5           | 6           | 6           | 2                                       | 3           | 4          | 5           | 6           | 6          | 2                                       | 3           | 4           | 5          | 6 | 2 | 3                                       | 4 | 5 | 6 |  |  |
| F   | 38.00±10.33           | 37.00±9.49 | 47.00±14.94 | 39.00±15.24 | 42.00±11.35 | 42.00±11.35 | 38.00±7.89                              | 46.00±18.38 | 39.00±7.38 | 47.00±14.18 | 32.00±16.19 | 41.00±7.38 | 46.00±12.65                             | 43.00±9.49  | 47.00±14.94 | 39.00±8.76 |   |   |                                         |   |   |   |  |  |
| H   | 25.53±8.79            | 25.53±8.79 | 25.84±9.83  | 25.84±9.83  | 26.48±9.07  | 26.81±9.71  | 25.84±9.83                              | 26.51±8.86  | 26.49±8.96 | 25.52±8.96  | 26.17±10.01 | 25.52±8.96 | 25.52±8.96                              | 29.80±11.78 | 28.18±11.36 | 25.84±8.31 |   |   |                                         |   |   |   |  |  |
| T   | 38.78±6.86            | 39.05±6.68 | 38.92±7.15  | 39.18±7.22  | 38.53±9.35  | 38.52±9.20  | 40.66±7.98                              | 30.24±8.27  | 34.65±8.25 | 35.31±6.62  | 37.58±5.44  | 33.59±8.06 | 30.91±8.44                              | 32.37±6.14  | 32.78±5.57  | 35.71±5.39 |   |   |                                         |   |   |   |  |  |
| BW  | 2.96±2.78             | 2.86±2.78  | 3.29±2.52   | 3.14±2.59   | 15.46±2.59  | 15.46±2.59  | 13.64±2.96                              | 13.93±2.97  | 7.75±3.12  | 4.45±2.32   | 2.77±1.78   | 2.99±2.08  | 11.01±4.25                              | 8.53±2.85   | 5.32±2.07   | 3.57±2.16  |   |   |                                         |   |   |   |  |  |
| I   | 11.39±4.01            | 11.11±3.91 | 11.68±3.92  | 12.54±5.26  | 10.02±3.83  | 4.01±3.07   | 4.72±2.94                               | 3.58±2.72   | 3.00±2.73  | 3.14±2.68   | 3.00±2.73   | 3.00±2.73  | 3.00±2.73                               | 3.29±2.34   | 3.29±2.34   | 3.00±2.37  |   |   |                                         |   |   |   |  |  |
| S   | 20.67±7.12            | 20.67±7.12 | 21.64±6.47  | 21.64±6.47  | 15.10±4.28  | 15.10±4.28  | 13.67±4.82                              | 14.82±5.85  | 13.69±4.25 | 13.97±4.38  | 13.40±5.41  | 14.53±4.94 | 11.40±2.85                              | 11.96±2.21  | 11.41±4.49  | 13.40±3.60 |   |   |                                         |   |   |   |  |  |
| WR  | 48.18±4.43            | 48.18±4.43 | 48.59±4.59  | 48.59±4.59  | 25.88±15.02 | 25.50±11.50 | 27.40±11.23                             | 27.38±9.72  | 24.02±8.71 | 28.40±8.74  | 28.86±9.11  | 28.38±9.25 | 23.10±9.62                              | 22.62±9.88  | 26.90±7.79  | 28.83±9.37 |   |   |                                         |   |   |   |  |  |
| Y   | 41.63±4.62            | 41.58±4.55 | 39.23±4.46  | 37.91±3.88  | 48.52±4.00  | 48.79±3.47  | 49.06±4.15                              | 48.45±4.60  | 49.33±3.83 | 47.17±4.47  | 46.77±3.67  | 48.79±2.64 | 49.53±3.18                              | 47.71±4.02  | 48.72±3.69  | 49.33±3.97 |   |   |                                         |   |   |   |  |  |
| Ca  | 41.63±4.62            | 41.58±4.55 | 39.23±4.46  | 37.91±3.88  | 48.52±4.00  | 48.79±3.47  | 49.06±4.15                              | 48.45±4.60  | 49.33±3.83 | 47.17±4.47  | 46.77±3.67  | 48.79±2.64 | 49.53±3.18                              | 47.71±4.02  | 48.72±3.69  | 49.33±3.97 |   |   |                                         |   |   |   |  |  |
| CCS | 40.00±4.62            | 39.90±4.70 | 40.90±3.31  | 39.90±4.56  | 57.90±4.12  | 57.90±4.12  | 57.60±4.12                              | 57.60±4.12  | 57.60±4.12 | 57.60±4.12  | 57.60±4.12  | 57.60±4.12 | 57.60±4.12                              | 57.60±4.12  | 57.60±4.12  | 57.60±4.12 |   |   |                                         |   |   |   |  |  |
| Ab  | 22.47±6.54            | 22.37±6.50 | 19.81±5.14  | 20.48±5.55  | 24.18±1.55  | 24.18±1.55  | 24.18±1.55                              | 24.18±1.55  | 24.18±1.55 | 24.18±1.55  | 24.18±1.55  | 24.18±1.55 | 24.18±1.55                              | 24.18±1.55  | 24.18±1.55  | 24.18±1.55 |   |   |                                         |   |   |   |  |  |
| Q   | 22.47±6.54            | 22.37±6.50 | 19.81±5.14  | 20.48±5.55  | 24.18±1.55  | 24.18±1.55  | 24.18±1.55                              | 24.18±1.55  | 24.18±1.55 | 24.18±1.55  | 24.18±1.55  | 24.18±1.55 | 24.18±1.55                              | 24.18±1.55  | 24.18±1.55  | 24.18±1.55 |   |   |                                         |   |   |   |  |  |
| WW  | 30.36±2.18            | 30.32±2.09 | 29.77±1.95  | 29.64±2.03  | 35.87±2.05  | 31.69±1.82  | 31.73±1.76                              | 31.56±1.76  | 31.56±1.76 | 31.56±1.76  | 31.56±1.76  | 31.56±1.76 | 31.56±1.76                              | 31.56±1.76  | 31.56±1.76  | 31.56±1.76 |   |   |                                         |   |   |   |  |  |
| P   | 19.26±1.91            | 19.24±1.84 | 6.01±1.18   | 7.80±1.45   | 35.61±1.93  | 28.69±2.38  | 22.33±6.19                              | 13.89±4.05  | 11.02±3.74 | 10.09±3.77  | 11.94±3.61  | 11.48±2.23 | 9.54±2.73                               | 8.80±2.32   | 8.33±2.90   | 7.87±2.66  |   |   |                                         |   |   |   |  |  |
| Mi  | 4.07±2.15             | 3.89±2.04  | 4.44±2.30   | 7.41±3.55   | 26.11±4.32  | 23.15±6.19  | 13.89±4.05                              | 11.02±3.74  | 10.09±3.77 | 11.94±3.61  | 11.48±2.23  | 9.54±2.73  | 8.80±2.32                               | 8.33±2.90   | 7.87±2.66   | 7.31±2.97  |   |   |                                         |   |   |   |  |  |
| Hen | 41.91±5.96            | 41.91±5.96 | 33.51±5.32  | 39.93±5.56  | 49.25±4.85  | 49.34±4.87  | 49.34±4.87                              | 49.34±4.87  | 49.34±4.87 | 49.34±4.87  | 49.34±4.87  | 49.34±4.87 | 49.34±4.87                              | 49.34±4.87  | 49.34±4.87  | 49.34±4.87 |   |   |                                         |   |   |   |  |  |
| Hmm | 41.99±5.45            | 41.99±5.45 | 32.91±5.07  | 37.95±4.98  | 48.76±4.78  | 48.76±4.78  | 48.76±4.78                              | 48.76±4.78  | 48.76±4.78 | 48.76±4.78  | 48.76±4.78  | 48.76±4.78 | 48.76±4.78                              | 48.76±4.78  | 48.76±4.78  | 48.76±4.78 |   |   |                                         |   |   |   |  |  |
| Ft  | 12.23±0.93            | 12.39±0.90 | 12.33±0.85  | 13.56±1.07  | 33.78±1.62  | 33.78±1.62  | 33.78±1.62                              | 33.78±1.62  | 33.78±1.62 | 33.78±1.62  | 33.78±1.62  | 33.78±1.62 | 33.78±1.62                              | 33.78±1.62  | 33.78±1.62  | 33.78±1.62 |   |   |                                         |   |   |   |  |  |
| Ma  | 21.00±1.00            | 21.01±0.93 | 20.91±0.97  | 20.94±0.98  | 26.41±0.97  | 21.41±0.88  | 21.41±0.88                              | 21.41±0.88  | 21.41±0.88 | 21.41±0.88  | 21.41±0.88  | 21.41±0.88 | 21.41±0.88                              | 21.41±0.88  | 21.41±0.88  | 21.41±0.88 |   |   |                                         |   |   |   |  |  |
| E   | 45.55±1.48            | 45.55±1.48 | 43.48±1.36  | 42.92±0.81  | 47.26±1.43  | 47.12±1.39  | 46.46±1.88                              | 45.23±1.93  | 44.07±1.45 | 44.75±1.06  | 44.51±1.80  | 44.83±1.50 | 44.06±1.82                              | 43.40±1.01  | 42.60±1.19  | 42.25±0.72 |   |   |                                         |   |   |   |  |  |
| Sk  | 9.62±0.22             | 10.18±0.29 | 10.74±0.21  | 9.65±0.23   | 33.97±0.29  | 33.97±0.29  | 33.97±0.29                              | 33.97±0.29  | 33.97±0.29 | 33.97±0.29  | 33.97±0.29  | 33.97±0.29 | 33.97±0.29                              | 33.97±0.29  | 33.97±0.29  | 33.97±0.29 |   |   |                                         |   |   |   |  |  |
| Mu  | 23.36±1.19            | 23.28±1.24 | 19.48±1.12  | 22.26±1.19  | 46.07±5.17  | 39.18±6.37  | 29.46±2.12                              | 28.22±1.87  | 26.20±1.46 | 32.92±2.97  | 32.11±2.72  | 32.80±2.15 | 28.54±2.03                              | 27.25±2.59  | 25.40±2.77  | 24.72±1.04 |   |   |                                         |   |   |   |  |  |
| Ha  | 1.98±0.23             | 3.11±0.31  | 3.11±0.33   | 1.76±0.25   | 9.73±0.44   | 2.28±0.21   | 2.28±0.21                               | 2.28±0.21   | 2.28±0.21  | 2.28±0.21   | 2.28±0.21   | 2.28±0.21  | 2.28±0.21                               | 2.28±0.21   | 2.28±0.21   | 2.28±0.21  |   |   |                                         |   |   |   |  |  |
| Tw  | 7.48±0.08             | 7.45±0.08  | 4.42±0.11   | 4.72±0.10   | 6.63±0.07   | 6.55±0.08   | 6.55±0.08                               | 6.55±0.08   | 6.55±0.08  | 6.55±0.08   | 6.55±0.08   | 6.55±0.08  | 6.55±0.08                               | 6.55±0.08   | 6.55±0.08   | 6.55±0.08  |   |   |                                         |   |   |   |  |  |

Table 2: Complete results for Table 1 (in main file). Domains ordered following Table 1 (in this SM). Each result is the average + stddev of the classifiers retained at each CV fold. The classifier retained at each fold is the one minimizing the empirical risk among the  $T, T^r$  boosting iterations.
